1 **Title:** Quantification of vascular networks in photoacoustic mesoscopy

2

3 **Authors:**

4 Emma L. Brown<sup>1,2,#</sup>, Thierry L. Lefebvre<sup>1,2,#</sup>, Paul W. Sweeney<sup>1,2,#</sup>, Bernadette J. Stolz<sup>3</sup>, Janek  
5 Gröhl<sup>1,2</sup>, Lina Hacker<sup>1,2</sup>, Ziqiang Huang<sup>2</sup> <sup>+</sup>, Dominique-Laurent Couturier<sup>2</sup>, Heather A.  
6 Harrington<sup>3</sup>, Helen M. Byrne<sup>3</sup> and Sarah E. Bohndiek<sup>1,2\*</sup>.

7

8 <sup>1</sup> Department of Physics, University of Cambridge, JJ Thomson Avenue, Cambridge, CB3  
9 0HE, U.K.

10

11 <sup>2</sup> Cancer Research UK Cambridge Institute, University of Cambridge, Robinson Way,  
12 Cambridge, CB2 0RE, U.K.

13

14 <sup>3</sup> Mathematical Institute, University of Oxford, Woodstock Road, Oxford, OX2 6GG, U.K.

15

16 <sup>+</sup> Now at: European Molecular Biology Laboratory Imaging Centre, Heidelberg, Germany.

17

18 <sup>#</sup> These authors contributed equally

19 <sup>\*</sup> Corresponding author: email [seb53@cam.ac.uk](mailto:seb53@cam.ac.uk), telephone +44 1223 337267.

20

21 **Keywords:** photoacoustic imaging, vasculature, segmentation, topology

22

23 **ABSTRACT**

24 Mesoscopic photoacoustic imaging (PAI) enables non-invasive visualisation of tumour  
25 vasculature and has the potential to assess prognosis and therapeutic response. Currently,  
26 evaluating vasculature using mesoscopic PAI involves visual or semi-quantitative 2D  
27 measurements, which fail to capture 3D vessel network complexity, and lack robust ground  
28 truths for assessment of segmentation accuracy. Here, we developed an *in silico*, phantom,  
29 *in vivo*, and *ex vivo*-validated end-to-end framework to quantify 3D vascular networks captured  
30 using mesoscopic PAI. We applied our framework to evaluate the capacity of rule-based and  
31 machine learning-based segmentation methods, with or without vesselness image filtering, to  
32 preserve blood volume and network structure by employing topological data analysis. We first  
33 assessed segmentation performance against ground truth data of *in silico* synthetic  
34 vasculatures and a photoacoustic string phantom. Our results indicate that learning-based  
35 segmentation best preserves vessel diameter and blood volume at depth, while rule-based  
36 segmentation with vesselness image filtering accurately preserved network structure in  
37 superficial vessels. Next, we applied our framework to breast cancer patient-derived  
38 xenografts (PDXs), with corresponding *ex vivo* immunohistochemistry. We demonstrated that  
39 the above segmentation methods can reliably delineate the vasculature of 2 breast PDX  
40 models from mesoscopic PA images. Our results underscore the importance of evaluating the  
41 choice of segmentation method when applying mesoscopic PAI as a tool to evaluate vascular  
42 networks *in vivo*.

43

## 44 INTRODUCTION

45 Tumour blood vessel networks are often chaotic and immature (Brown et al., 2019;  
46 Corliss et al., 2019; Hanahan & Weinberg, 2011; Krishna Priya et al., 2016; Nagy & Dvorak,  
47 2012), with inadequate oxygen perfusion and therapeutic delivery (Michiels et al., 2016;  
48 Trédan et al., 2007). The association of tumour vascular phenotypes with poor prognosis  
49 across many solid cancers (Brown et al., 2019) has generated substantial interest in non-  
50 invasive imaging of the structure and function of tumour vasculature, particularly longitudinally  
51 during tumour development. Imaging methods that have been tested to visualise the  
52 vasculature include whole-body macroscopic methods, such as computed tomography and  
53 magnetic resonance imaging, as well as localised methods, such as ultrasound and  
54 photoacoustic imaging (PAI) (Brown et al., 2019). Microscopy methods can achieve much  
55 higher spatial resolution but are typically depth limited, at up to ~1mm depth, and frequently  
56 applied *ex vivo* (Brown et al., 2019; Jährling et al., 2009; Kelch et al., 2015; Keller & Dodt,  
57 2012; Ntziachristos, 2010).

58 Of the available tumour vascular imaging methods, PAI is highly scalable and, as such,  
59 applicable for studies from microscopic to macroscopic regimes. By measuring ultrasound  
60 waves emitted from endogenous molecules, including haemoglobin, following the absorption  
61 of light, PAI can reconstruct images of vasculature at depths beyond the optical diffraction limit  
62 of ~1 mm (Beard, 2011; Ntziachristos, 2010; Ntziachristos et al., 2005; Wang & Yao, 2016).  
63 State-of-the-art mesoscopic systems now bridge the gap between macroscopy and  
64 microscopy, achieving ~20 µm resolution at up to 3 mm in depth (Omar et al., 2014, 2019).  
65 Preclinically, mesoscopic PAI has been used to monitor the development of vasculature in  
66 several tumour xenograft models (Haedicke et al., 2020; Omar et al., 2015; Orlova et al., 2019)  
67 and can differentiate aggressive from slow-growing vascular phenotypes (Orlova et al., 2019).  
68 Studies to-date, however, have been largely restricted to qualitative analyses due to the  
69 challenges of accurate 3D vessel segmentation, quantification and robust statistical analyses  
70 (Haedicke et al., 2020; Imai et al., 2017; Omar et al., 2015, 2019; Orlova et al., 2019; Rebling

71 et al., 2021). Instead, PAI quantification is typically manual and ad-hoc, with 2D measurements  
72 often extracted from 3D PAI data (Haedicke et al., 2020; Imai et al., 2017; Lao et al., 2008;  
73 Orlova et al., 2019; Soetikno et al., 2012), reducing repeatability and comparability across  
74 datasets.

75 To assess the performance and accuracy of such vessel analyses, ground truth  
76 datasets are needed with *a priori* known features (Krig & Krig, 2014). Creating full-network  
77 ground truth reference annotations could be achieved through comprehensive manual  
78 labelling of PAI data, but this is difficult due to: the lack of available experts to perform  
79 annotation with a new imaging modality; the time taken to label images; and the inherent noise  
80 and artefacts present in PAI data. Despite the numerous software packages available to  
81 analyse vascular networks (Corliss et al., 2019), their performance in mesoscopic PAI has yet  
82 to be evaluated, hence there is an unmet need to improve the quantification of vessel networks  
83 in PAI, particularly given the increasing application of PAI in the study of tumour biology  
84 (Haedicke et al., 2020; Omar et al., 2019; Orlova et al., 2019).

85 To quantify PAI vascular images and generate further insights into the role of vessel  
86 networks in tumour development and therapy response, accurate segmentation of the vessels  
87 must be performed (Corliss et al., 2019) (see step 1 in **Figure 1**). A plethora of segmentation  
88 methods exist and can be broadly split into two categories: rule-based and machine learning-  
89 based methods. Rule-based segmentation methods encompass techniques that automatically  
90 delineate the vessels from the background based on a custom set of rules (F. Zhao et al.,  
91 2019). These methods provide less flexibility and tend to consider only a few features of the  
92 image, such as voxel intensity (Haedicke et al., 2020; Orlova et al., 2019; Raumonon &  
93 Tarvainen, 2018; Soetikno et al., 2012) but they are easy-to-use, with no training dataset  
94 requirements. On the other hand, machine learning-based methods, such as random forest  
95 classifiers, delineate vessels based on self-learned features (Moccia et al., 2018; F. Zhao et  
96 al., 2019). Nonetheless, learning-based methods are data-driven, requiring large and high-  
97 quality annotated datasets for training and can have limited applicability to new datasets. To

98 tackle some of these issues, several software packages have been developed in recent years,  
99 and have become increasingly popular in life science research (Berg et al., 2019; Corliss et  
100 al., 2019; Sommer et al., 2011). Prior to segmentation, denoising and feature enhancement  
101 methods, such as Hessian-matrix based filtering, can also be applied to overcome the  
102 negative impact of noise and/or to enhance certain vessel structures within an image (Oruganti  
103 et al., 2013; Ul Haq et al., 2016; H. Zhao et al., 2019).

104 Here, we establish ground truth PAI data based on simulations conducted using  
105 synthetic vascular architectures generated *in silico* and, also using a photoacoustic string  
106 phantom, composed of a series of synthetic blood vessels (strings) of known structure, which  
107 can be imaged in real-time. Against these ground truths, we compare and validate the  
108 performance of two common vessel segmentation methods, with or without the application of  
109 3D Hessian matrix-based vesselness image filtering feature enhancement of blood vessels  
110 (steps 2 & 3 in **Figure 1**). Following skeletonisation of the segmentation masks, we perform  
111 statistical and topological analyses to establish how segmentation influences the architectural  
112 characteristics of a vascular network acquired using PAI (steps 4 & 5 in **Figure 1**). Finally, we  
113 apply our segmentation and analysis pipeline to two *in vivo* breast cancer models and  
114 undertake a biological validation of the segmentation and subsequent statistical and  
115 topological descriptors using *ex vivo* immunohistochemistry (IHC). Compared to a rule-based  
116 auto-thresholding method, our findings indicate that a learning-based segmentation, via a  
117 random forest classifier, is better able to account for the artefacts observed in our 3D  
118 mesoscopic PAI datasets, providing a more accurate segmentation of vascular networks.  
119 Statistical and topological descriptors of vascular structure are influenced by the chosen  
120 segmentation method, highlighting a need to validate and standardise segmentation methods  
121 in PAI for increased reproducibility and repeatability of mesoscopic PAI in biomedical  
122 applications.

123

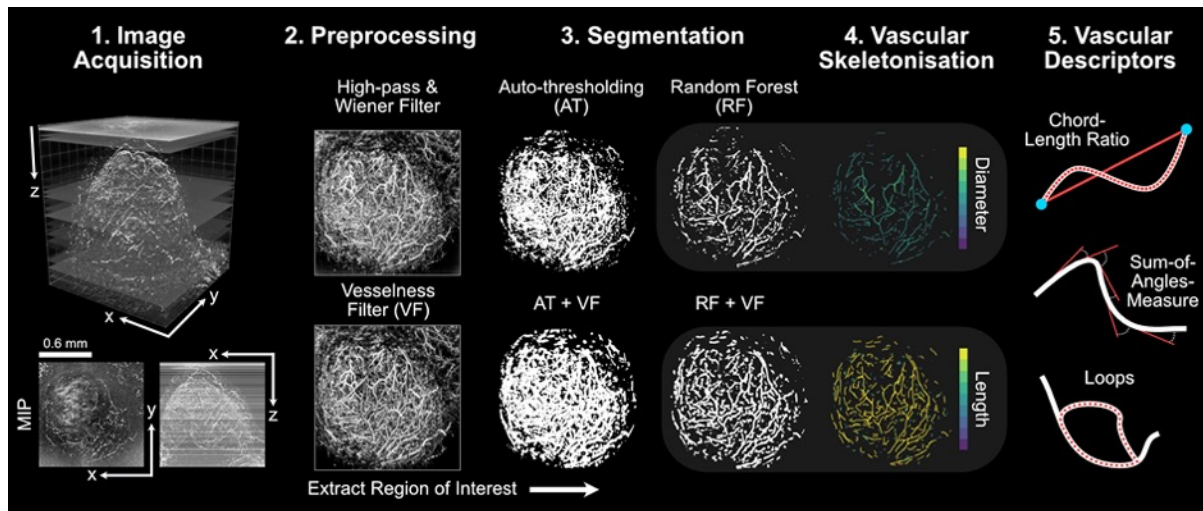

125 **Figure 1. The mesoscopic photoacoustic image analysis pipeline.** 1) Images are acquired  
126 and reconstructed at a resolution of  $20 \times 20 \times 4 \mu\text{m}^3$  (PDX tumour example shown with axial  
127 and lateral maximum intensity projections – MIPs). 2) Image volumes are pre-processed to  
128 remove noise and homogenise the background signal (high-pass and Wiener filtering followed  
129 by slice-wise background correction). Vesselness image filtering (VF) is an optional and  
130 additional feature enhancement method. 3) Regions of interest (ROIs) are extracted and  
131 segmentation is performed on standard and VF images using auto-thresholding (AT or AT +  
132 VF, respectively) or random forest-based segmentation with ilastik (RF or RF + VF,  
133 respectively). 4) Each segmented image volume is skeletonised (skeletons with diameter and  
134 length distributions shown for RF and RF + VF, respectively). 5) Statistical and topological  
135 analyses are performed on each skeleton to quantify vascular structures for a set of vascular  
136 descriptors. All images in steps 2-4 are shown as x-y MIPs.

137

138 **RESULTS**

139 ***In silico* simulations of synthetic vasculature enable segmentation precision to be**  
140 **evaluated against a known ground truth**

141 Our ground truth consisted of a reference dataset of synthetic vascular network binary  
142 masks (n=30) generated from a Lindenmayer System, referred to as L-nets (**Figure 2**;  
143 **Supplementary Movie 1** for 3D visualisation). We simulated PAI mesoscopy data from these  
144 L-nets (**Figure 2A**) and subsequently used vesselness filtering (VF) as an optional and  
145 additional feature enhancement method (**Figure 2B**). The four segmentation pipelines  
146 selected for testing (**Figure 1**) were applied to the simulated PAI data (**Figure 2C**), that is, all  
147 images were segmented with:

- 148 1. Auto-thresholding using a moment preserving method (AT);
- 149 2. Auto-thresholding using a moment preserving method with vesselness filtering pre-  
150 segmentation (AT+VF);
- 151 3. Random forest classifier (RF);
- 152 4. Random forest classifier with vesselness filtering pre-segmentation (RF+VF).

153 Visually, RF methods appear to segment a larger portion of synthetic blood vessels (**Figure**  
154 **2C**) and they are particularly good at segmenting vessels at depths furthest from the simulated  
155 light source (**Figure 2D**). A key image quality metric in the context of segmentation is the  
156 signal-to-noise (SNR), which is degraded at greater depth (**Figure 3A**). To evaluate the  
157 relative performance of the methods, we compared the segmented and skeletonised blood  
158 volumes (BV) from the simulated PAI data to the known ground truth from the L-net. Here, we  
159 found that the learning-based RF segmentation outperformed the others in making the  
160 segmentation masks, with significantly higher  $R^2$  (segmented BV: AT: 0.68, AT+VF: 0.58, RF:  
161 0.84, RF+VF: 0.89, **Figure 3B** skeleton BV: AT: 0.59, AT+VF: 0.73, RF: 0.90, RF+VF: 0.93,  
162 **Figure 3C**) and lower mean-squared error (MSE) (**Figure 3D**), with respect to the ground truth  
163 L-net volumes, compared to both AT methods ( $p < 0.0001$  for all comparisons). Bland-Altman

164 plots, which we used to illustrate the level of agreement between segmented and ground truth  
165 vascular volumes, showed a mean difference compared to the reference volume of  $0.61 \text{ mm}^3$   
166 (limits of agreement, LOA  $-0.48$  to  $1.7 \text{ mm}^3$ , **Figure 3E**) and F1 score of  $0.73 \pm 0.11$  ( $0.49$ -  
167  $0.88$ ) for RF segmentation, albeit with a wide variation indicated by the LOA. RT+VF  
168 segmentation resulted in a similar mean difference  $0.74 \text{ mm}^3$  (LOA  $-0.50$  to  $2.0 \text{ mm}^3$ , **Figure**  
169 **3F**) and F1 score of  $0.66 \pm 0.11$  ( $0.44$ - $0.84$ ). In comparison, the rule-based AT segmentation  
170 showed poor performance in segmenting vessels at depth (**Figure 2C, Supplementary Movie**  
171 **1**), yielding a mean difference of  $1.1 \text{ mm}^3$  (LOA  $-0.60$  to  $2.8 \text{ mm}^3$ ) and as with RT+VF, AT+VF  
172 did not improve the result, yielding the same mean difference of  $1.1 \text{ mm}^3$  (LOA  $-0.52$  to  $2.8$   
173  $\text{mm}^3$ ) (**Figure 3G,H**). F1 scores were poor for both AT methods, with  $0.39 \pm 0.10$  ( $0.21$ - $0.59$ )  
174 for AT and  $0.37 \pm 0.09$  ( $0.16$ - $0.52$ ) for AT+VF.

175 In all cases, the mean difference shown in Bland-Altman plots increased with ground  
176 truth vascular volume, especially in the rule-based AT segmentation, which would be expected  
177 due to the restricted illumination geometry of photoacoustic mesoscopy. Since more vessel  
178 structures lie at a greater distance from the simulated light source in larger L-nets, they suffer  
179 from the depth-dependent decrease in SNR (**Figure 3A**). RF segmentation was better able to  
180 cope with the SNR degradation, particularly at distances beyond  $\sim 1.5 \text{ mm}$ , compared to the  
181 AT segmentation, which consistently underestimated the vascular volume.

182 Next, we skeletonised each segmentation mask to enable us to perform statistical and  
183 topological data analysis (TDA) to test how each segmentation method quantitatively  
184 influences a core set of vessel network descriptors (Stolz et al., 2020). These descriptors  
185 allowed us to evaluate the performance of the different segmentation methods in respect of  
186 the biological characterisation of the tumour networks. We used the following statistical  
187 descriptors: vessel diameters and lengths, vessel tortuosity (sum-of-angles measure, SOAM)  
188 and vessel curvature (chord-to-length ratio, CLR). Our topological network descriptors are  
189 connected components (Betti number  $\beta_0$ ) and looping structures (1D holes, Betti number  $\beta_1$ )  
190 (see **Supplementary Table 1** for descriptor descriptions).



191 Here, the accuracy and strength of relationship between the segmented and ground  
192 truth vascular descriptors, calculated by MSE (see **Figure 3D**) and  $R^2$  values (**Supplementary**  
193 **Figure 1A-I**) respectively, gave the same conclusions. Across all skeletons, we measured an  
194 increased number of connected components ( $\beta_0$ ) and changes to the number of looping  
195 structures ( $\beta_1$ ) from the simulated compared to the ground truth L-nets, resulting in low  $R^2$  and  
196 high MSE for all methods (**Figure 3D**). The observed changes in these topological descriptors  
197 arise due to depth-dependent SNR and PAI echo artefacts. For all other descriptors, AT+VF  
198 outperformed the other segmentation methods in its ability to accurately preserve the  
199 architecture of the L-nets, with higher  $R^2$  and lowest MSE values for vessel lengths, CLR,  
200 SOAM, number of edges and number of nodes (**Figure 3D**).

201 Vessel diameters are accurately preserved by both RF segmentation methods,  
202 supporting our observation that these methods perform accurate vascular volume  
203 segmentation. We note that the number of edges and nodes are also well preserved by RF  
204 and RF+VF. This further supports the high accuracy of both RF methods to segment vascular  
205 structures.

206

207

208

209

210

211

212

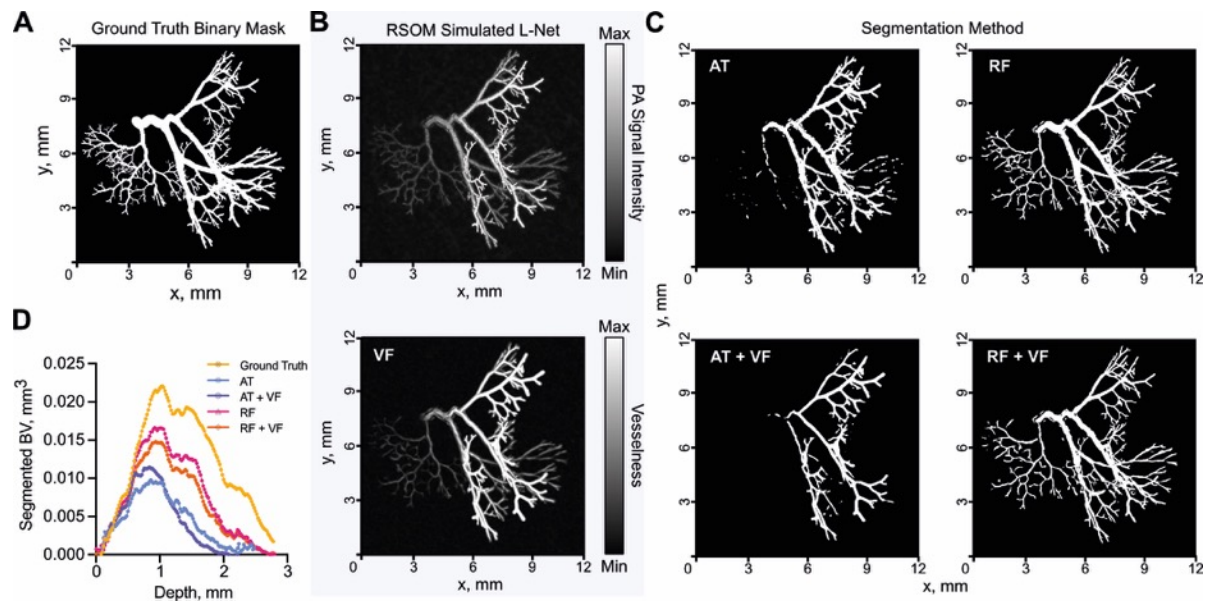

213

214 **Figure 2. Exemplar vascular architectures generated *in silico* and processed through**  
215 **our photoacoustic image analysis pipeline. (A-C) XY maximum intensity projections of L-**  
216 **net vasculature. (A) Ground truth L-Net binary mask used to simulate raster-scanning**  
217 **optoacoustic mesoscopy (RSOM) image shown in (B, top) and subsequent optional**  
218 **vesselness filtering (VF) (B, bottom). (C) Segmented binary masks generated using either**  
219 **auto-thresholding (AT), auto-thresholding after vesselness filtering (AT + VF), random forest**  
220 **classification (RF); or random forest classification after vesselness filtering (RF+VF). (D)**  
221 **Segmented blood volume (BV) average across L-net image volumes, plotted against image**  
222 **volume depth (mm). For (D) n=30 L-nets. See Supplementary Movie 1 for 3D visualisation.**

223

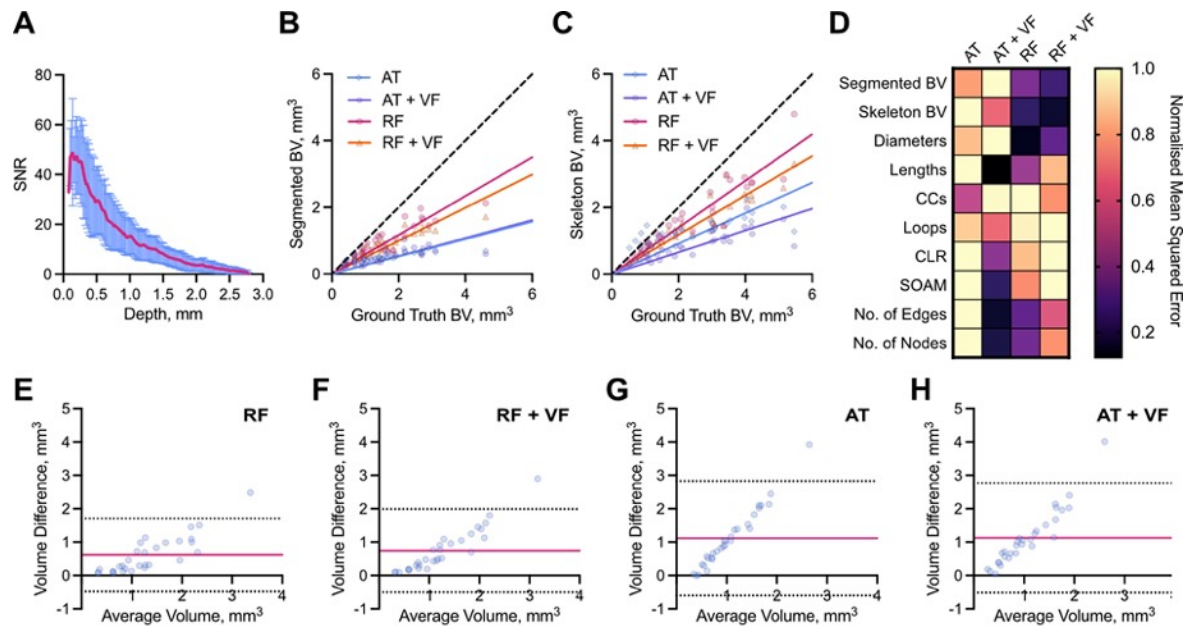

224

225 **Figure 3. Learning-based random forest classifier outperforms rule-based auto-**

226 **thresholding in segmenting simulated PAI vascular networks.** (A) Depth-wise comparison

227 of signal-to-noise ratio (SNR) measured in PAI-simulated L-nets across depth. (B,C) A

228 comparison between ground truth blood volume (BV) and (B) segmented or (C) skeletonised

229 blood volumes (BV). The dashed line indicates a 1:1 relationship. (D) Heat map displaying

230 normalised (with respect to the maximum of each individual descriptor) mean-squared error

231 comparing our vascular descriptors, calculated from segmented and skeletonised L-nets

232 compared to ground truth L-nets, to each segmentation method. Abbreviations defined:

233 connected components,  $\beta_0$  (CC), chord-to-length ratio (CLR), sum-of-angle measure (SOAM).

234 (E-H) Bland-Altman plots comparing blood volume measurements from ground truth L-nets

235 with that of each segmentation method: (E) RF, (F) RF+VF, (G) AT, (H) AT+VF. Pink lines

236 indicate mean difference to ground truth, whilst dotted black lines indicate limits of agreement

237 (LOA). For all subfigures n=30 L-nets.

238

## 239 **Random forest classifier accurately segments a string phantom**

240 We next designed a phantom test object (**Supplementary Figure 2**) to further  
241 compare the performance of our segmentation pipelines in a ground truth scenario. Agar  
242 phantom images (n=7) were acquired using a photoacoustic mesoscopy system and  
243 contained three strings of the same known diameter (126  $\mu\text{m}$ ), length ( $\sim 8.4$  mm) and  
244 consequently volume (104.74  $\mu\text{m}^3$ ), positioned at 3 different depths, 0.5 mm, 1 mm, and 2  
245 mm, respectively (**Figure 4A,B; Supplementary Movie 2**). Consistent with our *in silico*  
246 experiments, the accuracy of skeletonised string volumes decreased as a function of depth  
247 across all methods (**Figure 4C**), due to the decreased SNR with depth (**Figure 4D**).  
248 Interestingly, the significance of this decrease was very high for all comparisons (top vs.  
249 middle, top vs. bottom and middle vs. bottom) in both AT methods (all  $p < 0.001$ ), but we  
250 observed an improvement in string volume predictions across depth for both RF methods,  
251 such that middle vs. bottom string volumes were not significantly different in RF+VF ( $p = 0.42$ ).

252 The illumination geometry of the photoacoustic mesoscopy system means that vessels  
253 or strings are underrepresented when detected as the illumination source is located at the top  
254 surface of the tissue or phantom (**Figure 4E**). As a result, all string volumes computed from  
255 the segmented images are inaccurate relative to ground truth suggesting that blood volume  
256 cannot be accurately predicted from segmented PA images (**Figure 4F**). Skeletonisation  
257 provides a more accurate prediction of vessel and string volume as it approximates the  
258 undetected section by representing these objects as axisymmetric tubes (**Figure 4C,F**).

259

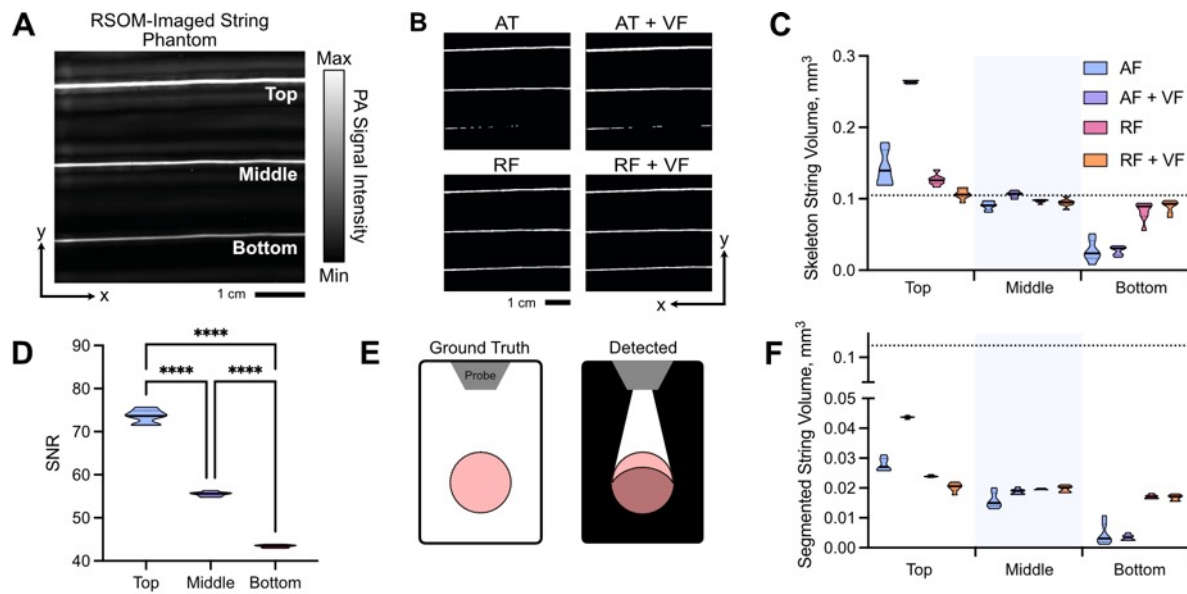

260

261 **Figure 4. Random forest classifier outperforms auto-thresholding in segmenting a**

262 **string phantom.** XY maximum intensity projections of string phantom imaged with RSOM

263 show that random forest-based segmentation outmatches auto-thresholding when correcting

264 for depth-dependent SNR. (A) Photoacoustic mesoscopy (RSOM) image shows measured

265 string PA signal intensity with top (0.5 mm), middle (1 mm) and bottom (2 mm) strings labelled.

266 (B) Binary masks are shown following segmentation using: (AT) auto-thresholding; (RF)

267 Random forest classifier; (AT+VF) vesselness filtered strings with auto-thresholding; and

268 (RF+VF) vesselness filtered strings with random-forest classifier. (C) Skeletonised string

269 volume calculated from segmented images of 3 strings placed at increasing depths in an agar

270 phantom. Results from all 4 segmentation pipelines are shown. All volume comparisons (top

271 vs. middle, top vs. bottom, middle vs. bottom) were significant ( $p < 0.05$ ) except middle vs.

272 bottom for RF+VF ( $p = 0.42$ ). (D) SNR decreases with increasing depth. (E) Illumination

273 geometry: known cross-section of string outlined (left); during measurement, signal is detected

274 from the partially illuminated section (outlined) resulting in an underestimation in string volume

275 (right). (F) String volume calculated pixel-wise from the segmented binary mask. (C,D,F) Data

276 represented by truncated violin plots with interquartile range (bold) and median (dotted),

277 \*\*\*\*= $p < 0.0001$  ( $n = 7$  scans). (C,F) Dotted line indicates ground truth volume  $0.105 \text{ mm}^3$ . See

278 Supplementary Movie 2 for 3D visualisation.

279

280 **Vesselness filtering of in vivo tumour images impacts computed blood volume**

281           Having established the performance of our AT- and RF-based segmentation methods  
282 *in silico* and in a string phantom, next we sought to determine the influence of the chosen  
283 method in quantifying tumour vascular networks from size-matched breast cancer patient-  
284 derived xenograft (PDX) tumours of two subtypes (ER-  $n=6$ ; ER+  $n=8$ , total  $n=14$ ).

285           Visual inspection of the tumour networks subjected to our processing pipelines  
286 suggests that VF increases vessel diameters *in vivo* (**Figure 5A-C; see Supplementary**  
287 **Movie 3** for 3D visualisation). This could be due to acoustic reverberations observed  
288 surrounding vessels *in vivo*, which VF scores with high vesselness, spreading the apparent  
289 extent of a given vessel and ultimately increased volume. Our quantitative analysis confirmed  
290 this hypothesis, where significantly higher skeletonised blood volumes were calculated in the  
291 AT+VF and RF+VF masks compared to AT and RF alone (**Figure 5D**).

292

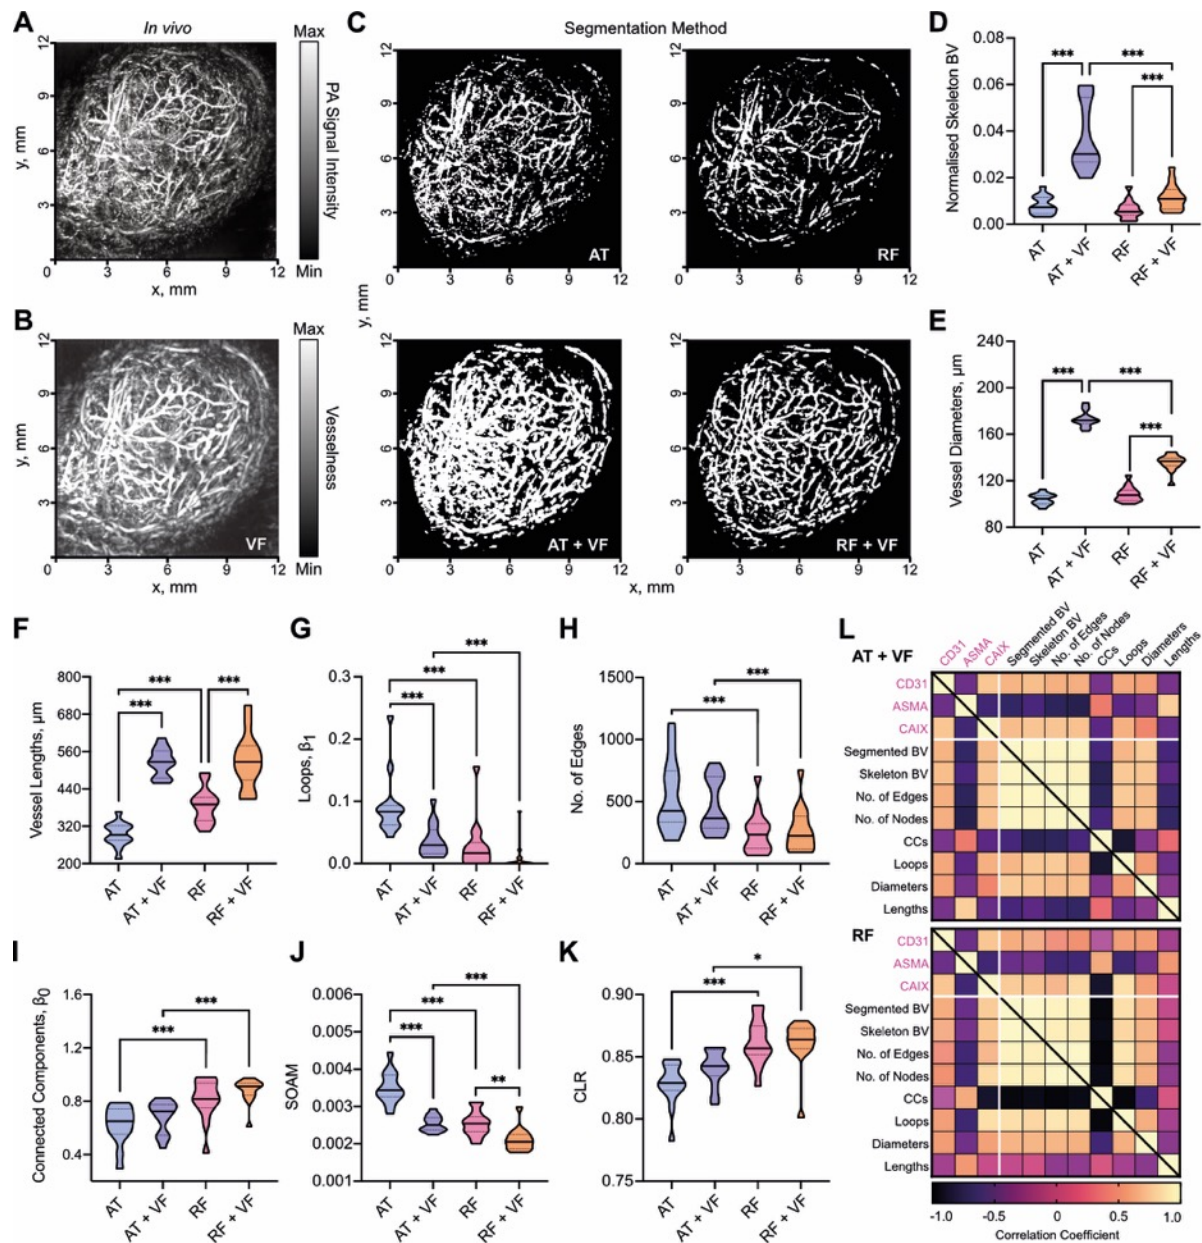

293

294 **Figure 5. Vesselness filtering increases blood volume calculations from *in vivo* tumour**  
 295 **images.** XY Maximum intensity projections of breast PDX tumours imaged with RSOM: (A)  
 296 original image before segmentation; (B) original image with vesselness filtering (VF) applied;  
 297 (C) a panel showing segmentation with each method (AT: auto-thresholding, AT+VF: auto-  
 298 thresholding with VF, RF: random forest classifier, and RF + VF: random forest with VF). (D)  
 299 Skeletonised tumour blood volume (BV) from all 4 segmentation methods normalised to ROI  
 300 volume. Statistical and topological data analyses were performed on skeletonised tumour  
 301 vessel vascular networks for the following descriptors: (E) Total number of edges; (F)

302 Connected components normalised by network volume,  $\beta_0$ ; (G) loops normalised by network  
303 volume,  $\beta_1$ ; (H) sum-of-angle measure (SOAM); (I) vessel lengths; (J) vessel diameters; (K)  
304 chord-to-length ratio (CLR). In (D-K), data are represented by truncated violin plots with  
305 interquartile range (dotted) and median (bold). Pairwise comparisons of AT vs. AT+VF, AT vs.  
306 RF, RF vs. RF+VF and AT+VF vs. RF+VF calculated using a linear mixed effects model (\*=  
307  $p < 0.05$ , \*\*= $p < 0.01$ , \*\*\*= $p < 0.001$ ,). L) Matrix of correlation coefficients for comparisons  
308 between IHC, BV and vascular descriptors for (top) AT+VF and (bottom) RF segmented  
309 networks. Pearson or spearman coefficients are used as appropriate, depending on data  
310 distribution. For (D)  $n=14$ , (E-K)  $n=13$  due to imaging artefact in one image which will impact  
311 our vascular descriptors. For (L) comparisons involving BV  $n=14$ , all other vascular descriptors  
312  $n=13$ . See Supplementary Movie 3 for 3D visualisation.

313



314 **Network structure analyses and comparisons to *ex vivo* immunohistochemistry of**  
315 **tumour vasculature are impacted by the choice of segmentation method**

316 Next, we computed vascular descriptors for our dataset of segmented *in vivo* images.  
317 As expected from our initial *in silico* and phantom evaluations, VF led to increased vessel  
318 diameters and lengths (**Figure 5E,F**), as well as blood volume. Our *in silico* analysis indicated  
319 that AT performs poorly in differentiating vessels from noise and introduces many vessel  
320 discontinuities (**Supplementary Table 1**). This was exacerbated *in vivo* where more complex  
321 vascular networks and real noise lead to an increase in segmented blood volume ( $p < 0.01$ ),  
322 looping structures (**Figure 5G**), a greater number of edges (**Figure 5H**), and reduced number  
323 of connected components (**Figure 5I**).

324 Our prior *in silico* and phantom experiments indicate that RF-based methods have a  
325 greater capacity to segment vessels at depth. Similarly, we observe more connected  
326 components for RF-based methods *in vivo* (**Figure 5I**) along with lower SOAM (**Figure 5J**)  
327 and higher CLR (**Figure 5K**), suggesting that RF-segmented vessels have reduced tortuosity  
328 and curvature compared to AT+VF segmented vessels. These *in vivo* findings support our  
329 observations from *in silico* and phantom studies where RF-based methods provide the most  
330 reliable prediction of vascular volume, whereas AT+VF best preserves architecture towards  
331 the tissue surface.

332 Next, we sought to assess how our vascular metrics correlated with the following *ex*  
333 *vivo* IHC descriptors: CD31 staining area (to mark vessels), ASMA vessel coverage (as a  
334 marker of pericyte/smooth muscle coverage and vessel maturity) and CAIX (as a marker of  
335 hypoxia) to provide *ex vivo* biological validation of our *in vivo* descriptors. Our *in silico*,  
336 phantom and *in vivo* analyses indicate that AT+VF and RF are the top performing  
337 segmentation methods and so we focussed on these (results for AT and RF+VF can be found  
338 in **Supplementary Figure 3**). We note that none of the vascular metrics derived from AT  
339 segmented networks correlated with IHC descriptors.

340 Both AT+VF and RF skeletonised blood volume correlate with CD31 staining area  
341 ( $r=0.54$ ,  $p=0.05$ ; and  $r=0.61$ ,  $p=0.02$  respectively; **Figure 5L**). This is as expected as elevated  
342 CD31 indicates a higher number of blood vessels and, consequently, higher vascular volume.  
343 The following correlations are observed for ASMA vessel coverage: vessel diameters ( $r=-0.41$ ,  
344  $p=0.17$ ; and  $r=-0.43$ ,  $p=0.14$ , respectively); looping structures ( $r=-0.68$ ,  $p=0.01$ ; and  $r=-0.58$ ,  
345  $p=0.04$ , respectively); number of edges ( $r=-0.69$ ,  $p=0.01$ ; and  $r=-0.65$ ,  $p=0.02$ , respectively);  
346 number of nodes ( $r=-0.70$ ,  $p=0.01$ ; and  $r=-0.65$ ,  $p=0.02$ , respectively); vessel lengths ( $r=0.76$ ,  
347  $p=0.03$ ; and  $r=0.5$ ,  $p=0.08$ , respectively); connected components ( $r=0.38$ ,  $p=0.22$ ; and  $r=0.59$ ,  
348  $p=0.03$ , respectively). Considering the strengths of AT+VF and RF, these results are  
349 biologically intuitive as tumour vessel maturation may lead to higher pericyte coverage, lower  
350 vessel density and the pruning of redundant vessels. Elevated pericyte coverage is known to  
351 decrease vessel diameters (Barlow et al., 2013), whereas high vessel density resulting from  
352 high angiogenesis rates can result in immature vessel networks (Brown et al., 2019). Pruning  
353 may lead to a reduction in looping structures and, consequently, an increase in vessel lengths  
354 or vascular subnetworks.

355 Finally, levels of hypoxia in the tumours, measured by CAIX IHC, positively correlated  
356 in both AT+VF and RF methods with skeletonised blood volume ( $r=0.72$ ,  $p=0.007$ ; and  $r=0.72$ ,  
357  $p=0.004$ , respectively), number of edges ( $r=0.59$ ,  $p=0.04$ ; and  $r=0.84$ ,  $p<0.001$ , respectively),  
358 nodes ( $r=0.72$ ,  $p=0.007$ ; and  $r=0.84$ ,  $p<0.001$ , respectively) and looping structures ( $r=0.61$ ,  
359  $p=0.03$ ; and  $r=0.85$ ,  $p<0.001$ , respectively). In the case of blood volume, edges and nodes,  
360 these results are expected as it has been shown that breast cancer tumours with dense but  
361 immature and dysfunctional vasculatures exhibit elevated hypoxia (Brown et al., 2019; Quiros-  
362 Gonzalez et al., 2018), likely due to poor perfusion. CAIX negatively correlated with connected  
363 components for RF networks ( $r=-0.87$ ,  $p<0.001$ ) (**Figure 5L**), reflecting results for ASMA  
364 vessel coverage. Our cross-validation between *ex vivo* IHC and vascular descriptors indicate  
365 that RF and AT+VF segmentation methods can reliably capture biological characteristics in  
366 tumours.

367 **Ex vivo immunohistochemistry and network structural analyses highlight distinct**  
368 **vascular networks between ER- and ER+ breast patient-derived xenograft tumours**

369 Finally, we quantified and compared IHC and our vascular descriptors between the  
370 two breast cancer subtypes represented (RF in **Figure 6**; AT+VF in **Supplementary Figure**  
371 **4**; similar trends and significances are observed unless stated otherwise). From analysis of  
372 IHC images (**Figure 6A**), ER- tumours had higher CD31 staining area (**Figure 6B**), poorer  
373 ASMA+ pericyte vessel coverage (**Figure 6C**) and higher CAIX levels (**Figure 6D**) compared  
374 to ER+ tumours. Our IHC data supports our RF-derived vascular descriptors, where we found  
375 that ER- tumours had denser networks, with higher blood volume, diameter and looping  
376 structures (**Figure 6E,F,G**). ER+ tumours have a sparse network but showed more  
377 subnetworks (**Figure 6H**) with significantly longer vessels in AT+VF segmented networks  
378 ( $p < 0.05$ , **Supplementary Figure 4C**), which could indicate a more mature vessel network  
379 based on our prior correlative analyses. No significant differences between the two models  
380 were observed for blood vessel tortuosity and curvature (**Figure 6J,K**).

381

382

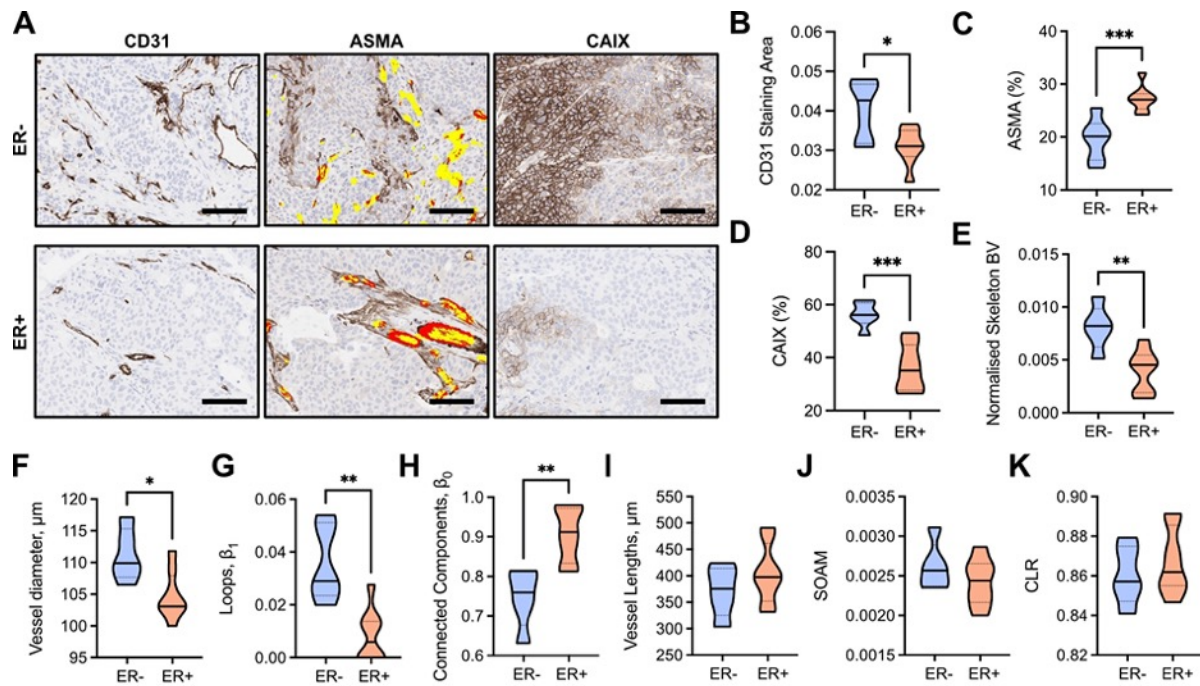

383

384 **Figure 6. ER- PDX tumours have dense and immature vascular networks which result**

385 **in hypoxic tumour tissue.** (A) Exemplar IHC images of CD31, ASMA and CAIX stained ER-

386 and ER+ tumours. Scale bar=100 $\mu\text{m}$ . Brown staining indicates positive expression of marker.

387 ASMA sections display CD31 overlay, where red indicates areas where CD31 and ASMA are

388 colocalised (ASMA vessel coverage) and yellow indicates areas where CD31 is alone. (B)

389 CD31 staining area quantified from CD31 IHC sections and normalised to tumour area. (C)

390 ASMA vessel coverage of CD31+ vessels (number of red pixels/number of red+yellow pixels,

391 expressed as a percentage) on ASMA IHC sections. (D) CAIX total positive pixels as a

392 percentage of the total tumour area pixels on CAIX IHC sections. (E-K) Statistical and

393 topological data analyses comparing ER- and ER+ tumours. Data are represented by

394 truncated violin plots with interquartile range (dotted black) and median (solid black).

395 Comparisons between ER- and ER+ tumours made with unpaired t-test. \*= p<0.05, \*\*=p<0.01,

396 \*\*\*=p<0.001. For (B-E) ER- n=6, ER+ n=8. For (F-K) ER- n=5, ER+ n=8, one ER- image

397 excluded with artefact that would impact the measured vascular descriptors.

398

399 **DISCUSSION**

400

401           Mesoscopic PAI enables longitudinal visualisation of blood vessel networks at high  
402 resolution, non-invasively and at depths beyond the optical diffraction limit of 1 mm  
403 (Ntziachristos, 2010; Ntziachristos et al., 2005; Omar et al., 2019; Wang & Yao, 2016). To  
404 quantify the vasculature, PA images need to be accurately segmented. Manual annotation of  
405 vasculature in 3D PAI is difficult due to depth-dependent signal-to-noise and imaging artefacts.  
406 Whilst a plethora of vascular segmentation techniques are available (Corliss et al., 2019;  
407 Moccia et al., 2018), their application in PAI has been limited due to a lack of an available  
408 ground truth for comparison and validation.

409           In this study, we first sought to address the need for ground truth data in PAI  
410 segmentation. We generated two ground truth datasets to assess the performance of rule-  
411 based and machine learning-based segmentation approaches with or without feature  
412 enhancement via vesselness filtering. The first is an *in silico* dataset where PAI was simulated  
413 on 3D synthetic vascular architectures; the second is an experimental dataset acquired from  
414 a vessel-like string phantom. These allowed us to evaluate the ability of different segmentation  
415 methods to preserve blood volume and vascular network structure.

416           Our first key finding is that machine learning-based segmentation using RF  
417 classification provided the most accurate segmentation of vessel volumes across our *in silico*,  
418 phantom and *in vivo* datasets, particularly at depths beyond ~1.5mm, where SNR diminishes  
419 due to optical attenuation. Compared to the AT approaches, RF-based segmentation partially  
420 overcomes the depth dependence of PAI SNR since it identifies and learns edge and texture  
421 features of vessels at different scales and contrasts. Such intrinsic depth-dependent  
422 limitations are often ignored in the literature, where analyses are typically performed on 2D  
423 maximum intensity projections for simplicity (Haedicke et al., 2020; Imai et al., 2017; Lao et  
424 al., 2008; Omar et al., 2015; Orlova et al., 2019; Soetikno et al., 2012), suggesting that a fully

425 3D machine learning-based segmentation is needed to accurately recapitulate the complexity  
426 of *in vivo* vasculatures measured using PAI.

427 As blood vessel networks can be represented as complex, interconnected graphs, we  
428 performed statistical and topological data analyses (Chung et al., 2019; Stolz et al., 2020) to  
429 further assess the strengths and weaknesses of our chosen segmentation methods.

430 Our second key finding is that AT methods struggle to segment vessels with low SNR,  
431 but adding VF outperforms all other methods in preserving vessel lengths, loops, curvature  
432 and tortuosity. Additionally, where intensity varies across a vessel structure, this results in  
433 many disconnected vessels when segmenting with AT alone, as only the highest intensity  
434 voxels will pass the threshold. Only when vesselness filtering is applied does AT do well at  
435 preserving topology. VF alters the intensity values from a measure of PA signal to a prediction  
436 of 'vesselness', generating a more homogeneous intensity across the vessel structures and  
437 ultimately a more continuous vessel structure to segment. This likely explains why AT+VF best  
438 preserves vessel length and, subsequently, network structure, while AT alone performs poorly.  
439 For AT, VF improved BV predictions *in silico* via better preservation of lengths but not  
440 diameters, as our phantom experiments indicate that AT+VF overestimates diameter.

441 Owing to the homogenous intensity of vessels introduced by VF, one could therefore  
442 assume that RF+VF would be the most accurate method at preserving network structure (by  
443 combining the machine-learning accuracy of segmentation with the shape enhancement of  
444 VF). However, this is not the case: RF alone can account for discontinuities in vessel intensity,  
445 unlike AT, meaning it does not rely on VF to enhance structural preservation, which is our third  
446 key finding. In fact, the slight inaccuracy in diameter preservation introduced by VF *in silico*  
447 appears to decrease topology preservation in RF+VF compared to RF alone. As expected, all  
448 methods led to an increase in the number of subnetworks (connected components) *in silico*,  
449 as these segmentation methods cannot reconnect vessel subnetworks that were disconnected  
450 due to poor SNR or imaging artefacts. Given the better segmentation at depth by RF-methods,

451 we hypothesise that these increasingly small subnetworks might have biased the  
452 segmentations to underperform in our vascular descriptors. This could be explored in future  
453 work, for example, by developing string phantoms with more complex topologies.

454       Taken together, our results suggest that RF performs feature detection across scales  
455 in the manually labelled voxels to learn discriminating characteristics for vessel classification  
456 and segmentation. Adding VF before RF segmentation may confound this segmentation  
457 framework, because VF systematically smooths images and removes non-cylindrical raw  
458 image information, which may have been vital in the RF learning of vascular structures on the  
459 training dataset.

460       Applying statistical and topological analyses to our *in vivo* tumour PDX dataset we  
461 observed trends consistent with our *in silico* and phantom experiments. Cross-validating our  
462 vascular descriptors with *ex vivo* IHC confirmed that we can extract biologically relevant  
463 information from mesoscopic PA images. For example, predictions of BV correlated with  
464 endothelial cell and hypoxia markers via CD31 and CAIX staining, respectively; and  
465 descriptors relating to the maturation of vascular structures correlated with ASMA vessel  
466 coverage. Applying our segmentation pipeline to compare ER- and ER+ breast cancer PDX  
467 models showed that descriptors of network structure can capture the higher density and  
468 immaturity of ER- vessel networks which result in decreased oxygen delivery and high hypoxia  
469 levels in comparison to ER+ tumours.

470       While our pipeline yields encouraging correlations to the underlying tumour  
471 vasculature, avenues of further development exist to: improve the realism of our ground truth  
472 data, including advances in simulation complexity, and tissue-specific synthetic and phantom  
473 vasculatures. While our *in silico* PAI dataset incorporated the effects of depth-dependent SNR  
474 and gaussian noise found in *in vivo* PAI mesoscopic data, further development of the optical  
475 simulations could, for example, recapitulate the raster-scanning motion of illumination optical  
476 fibres, instead of approximating a simultaneous illumination plane of single-point sources. The

477 limited aperture of the raster-scanning ultrasound transducer could not be simulated in k-Wave  
478 as it is not yet implemented for 3D structures. In terms of vascular complexity, our string  
479 phantom represents a highly idealised vessel networks but future work could introduce more  
480 complex and interconnected vessel-like networks in order to replicate more realistic vascular  
481 topologies (Dantuma et al., 2019). Our *ex vivo* IHC descriptors were used to confirm our *in*  
482 *vivo* tumour analyses but did not exhibit correlations across all vascular descriptors. This may  
483 be expected as the 2D IHC analysis does not fully encompass the 3D topological  
484 characteristics of the vascular network. 3D IHC, microCT or light sheet fluorescence  
485 microscopy may provide improved *ex vivo* validation using exogenous labelling to identify 3D  
486 vascular structures, such as tortuosity, at endpoint (Epah et al., 2018; Hlushchuk et al., 2019).  
487 It should also be noted that we cannot discount the effect of unconscious biases on  
488 segmentation performance when manually labelling images with and without VF to train the  
489 classifier. The segmentation accuracy of classifiers trained by multiple users could be explored  
490 in future work to formally investigate these effects.

491         Furthermore, the past decade has seen the rise of a multitude of blood vessel  
492 segmentation methods using convolutional neural networks and deep learning (Jia & Zhuang,  
493 2021). Applying deep learning to mesoscopic PAI could provide a means to overcome several  
494 equipment-related limitations such as: vessel discontinuities induced by breathing motion *in*  
495 *vivo*; vessel orientation relative to the ultrasound transducer; shadow and reflection artefacts;  
496 or underestimation of vessel diameter in the z-direction due to surface illumination. Whilst we  
497 found that skeletonisation addressed diameter underestimation and observed the influence of  
498 discontinuities on the extracted statistical and topological descriptors, they were not deeply  
499 characterised or corrected. Nonetheless, whilst deep learning may provide superior  
500 performance when fine-tuned to specific tasks, the resulting methods may lack generalisability  
501 across tissues with differing SNR and blood structures, requiring large datasets for training. In  
502 this study we chose to use software that is open-source and widely accessible to biologists in



503 the life sciences. We believe that such a platform shows more potential to be employed widely  
504 with limited computational expertise.

505 In summary, we developed an *in silico*, phantom, *in vivo*, and *ex vivo*-validated end-to-  
506 end framework for the segmentation and quantification of vascular networks captured using  
507 mesoscopic PAI. We created *in silico* and string phantom ground truth PAI datasets to validate  
508 segmentation of 3D mesoscopic PA images. We then applied a range of segmentation  
509 methods to these and images of breast PDX tumours obtained *in vivo*, including cross-  
510 validation of *in vivo* images with *ex vivo* IHC. We have shown that learning-based  
511 segmentation, via a random forest classifier, best accounted for the artefacts present in  
512 mesoscopic PAI, providing a robust segmentation of blood volume at depth in 3D and a good  
513 approximation of vessel network structure. Despite the promise of the learning-based  
514 approach to account for depth-dependent variation in SNR, auto-thresholding with vesselness  
515 filtering more accurately represents statistical and topological characteristics in the superficial  
516 blood vessels as it better preserves vessel lengths. Therefore, when quantifying PA images,  
517 users need to consider the relative importance of each descriptor as the choice of  
518 segmentation method can directly impact the resulting analyses. We have highlighted the  
519 potential of statistical and topological analyses to provide a detailed parameterisation of  
520 tumour vascular networks, from classic statistical descriptors such as vessel diameters and  
521 lengths to more complex descriptors of network topology characterising vessel connectivity  
522 and loops. Our results further underscore the potential of photoacoustic mesoscopy as a tool  
523 to provide biological insight into studying vascular network *in vivo* by providing life scientists  
524 with a readily deployable and cross-validated pipeline for data analysis.

525

## 526 MATERIALS AND METHODS

### 527 Generating ground truth vascular architectures in silico

528 To generate an *in silico* ground truth vascular network, we utilised Lindenmayer  
529 systems (L-Systems, see **Supplementary Figure 5**) (Lindenmayer, 1968). L-Systems are  
530 language-theoretic models that were originally developed to model cellular interactions but  
531 have been extended to model numerous developmental processes in biology (Rozenberg &  
532 Arto Salomaa, 1992). Here, we apply L-Systems to generate realistic, 3D vascular  
533 architectures (Galarreta-Valverde, 2012; Galarreta-Valverde et al., 2013) (referred to as L-  
534 nets) and corresponding binary image volumes. A stochastic grammar was used (Galarreta-  
535 Valverde, 2012) to create a string that was evaluated using a lexical and syntactic analyser to  
536 build a graphical representation of each L-net. To transfer the L-net to a discretised binary  
537 image volume, we used a modified Bresenham's algorithm (Bresenham, 1965) for 3D to create  
538 a vessel skeleton. Voxels within a vessel volume were then identified using the associated  
539 vessel diameter for each centreline (**Supplementary Figure 5**).

### 540 Photoacoustic image simulation of synthetic ground truths

541 To test the accuracy of the segmentation pipelines, the L-nets were then used to  
542 simulate *in vivo* photoacoustic vascular networks embedded in muscle tissue using the  
543 Simulation and Image Processing for Photoacoustic Imaging (SIMPA) python package  
544 (SIMPA v0.1.1, <https://github.com/CAMI-DKFZ/simpa>) (Janek Gröhl, Kris K. Dreher, Melanie  
545 Schellenberg, Alexander Seitel, 2021) and the k-Wave MATLAB toolbox (k-Wave v1.3,  
546 MATLAB v2020b, MathWorks, Natick, MA, USA) (Treeby & Cox, 2010). Planar illumination of  
547 the L-nets on the XY plane was achieved using Monte-Carlo eXtreme (MCX v2020, 1.8)  
548 simulation on the L-net computational grid of size 10.24 x 10.24 x 2.80 mm<sup>3</sup> with 20 µm  
549 isotropic resolution. The optical forward modelling was conducted at 532 nm using the optical  
550 absorption spectrum of 50% oxygenated haemoglobin for vessels (an approximation of tumour  
551 vessel oxygenation based on previously collected photoacoustic data (Quiros-Gonzalez et al.,

552 2018) and of water for muscle. Next, 3D acoustic forward modelling was performed on the  
553 illuminated L-nets assuming a speed of sound of  $1500 \text{ ms}^{-1}$  in k-Wave. The photoacoustic  
554 response of the illuminated L-nets was measured with a planar array of sensors positioned on  
555 the surface of the XY plane with transducer elements of bandwidth central frequency of 50  
556 MHz (100% bandwidth) and using a 1,504 time steps, where a time step is  $5 \times 10^{-8} \text{ Hz}^{-1}$ ). Finally,  
557 the 3D initial PA wave-field was reconstructed using fast Fourier transform-based  
558 reconstruction (Treeby & Cox, 2010), after adding uniform gaussian noise on the collected  
559 wave-field.

## 560 **String phantom**

561 We used a string phantom as a ground truth structure (see **Supplementary**  
562 **Materials**). The agar phantom was prepared as described previously (Joseph et al., 2017)  
563 including intralipid (I141-100ML, Merck, Gillingham, UK) to mimic tissue-like scattering  
564 conditions. Red-coloured synthetic fibres (Smilco, USA) were embedded at three different  
565 depths defined by the frame of the phantom to provide imaging targets with a known diameter  
566 of  $126 \mu\text{m}$ . The top string was positioned at 0.5 mm from the agar surface, the middle one at  
567 1 mm, and the bottom one at 2 mm, as shown in **Supplementary Figure 2**.

## 568 **Animals**

569 All animal procedures were conducted in accordance with project and personal  
570 licences, issued under the United Kingdom Animals (Scientific Procedures) Act, 1986 and  
571 approved locally under compliance forms CFSB1567 and CFSB1745. For *in vivo* vascular  
572 tumour models, cryopreserved breast PDX tumour fragments in freezing media composed of  
573 heat-inactivated foetal bovine serum (10500064, Gibco™, Fisher Scientific, Göteborg  
574 Sweden) and 10% dimethyl sulfoxide (D2650, Merck) were defrosted at  $37^\circ\text{C}$ , washed with  
575 Dulbecco's Modified Eagle Medium (41965039, Gibco) and mixed with matrigel (354262,  
576 Corning®, NY, USA) before surgical implantation. One estrogen receptor negative (ER-, n=6)  
577 PDX model and one estrogen receptor positive (ER+, n=8) PDX model were implanted

578 subcutaneously into the flank of 6-9 week-old NOD scid gamma (NSG) mice (#005557, Jax  
579 Stock, Charles River, UK) as per standard protocols (Bruna et al., 2016). Once tumours had  
580 reached ~1cm mean diameter, tumours were imaged and mice sacrificed afterwards, with  
581 tumours collected in formalin for IHC.

## 582 **Photoacoustic imaging**

583 Mesoscopic PAI was performed using the raster-scan optoacoustic mesoscopy  
584 (RSOM) Explorer P50 (iThera Medical GmbH, Munich, Germany). The system uses a 532 nm  
585 laser for excitation. Two optical fibre bundles are arranged either side of a transducer, which  
586 provide an elliptical illumination beam of approximately 4 mm x 2 mm in size. The transducer  
587 and lasers collectively raster-scan across the field-of-view. A high-frequency single-element  
588 transducer with a centre frequency of 50 MHz (>90% bandwidth) detects ultrasound. The  
589 system achieves a lateral resolution of 40  $\mu\text{m}$ , an axial resolution of 10  $\mu\text{m}$  and a penetration  
590 depth of up to ~3 mm (Omar et al., 2013).

591 For image acquisition of both phantom and mice, degassed commercial ultrasound gel  
592 (AquaSonics Parker Lab, Fairfield, NJ, USA) was applied to the surface of the imaging target  
593 for coupling to the scan interface. Images were acquired over a field of view of 12  $\times$  12 mm<sup>2</sup>  
594 (step size: 20  $\mu\text{m}$ ) at either 100% (phantom) or 85% (mice) laser energy and a laser pulse  
595 repetition rate of 2 kHz (phantom) or 1 kHz (mice). Image acquisition took approximately 7  
596 min. Animals were anaesthetised using 3-5% isoflurane in 50% oxygen and 50% medical air.  
597 Mice were shaved and depilatory cream applied to remove fur that could generate image  
598 artefacts; single mice were placed into the PAI system, on a heat-pad maintained at 37°C.  
599 Respiratory rate was maintained between 70-80 bpm using isoflurane (~1-2% concentration)  
600 throughout image acquisition.

601

602

603

## 604 **Segmentation and extraction of structural and topological vascular descriptors**

605 All acquired data were subjected to pre-processing prior to segmentation,  
606 skeletonisation and structural analyses of the vascular network, with an optional step of  
607 vesselness filtering also tested (**Figure 1**). Prior to segmentation, data were filtered in the  
608 Fourier domain in XY plane to remove reflection lines, before being reconstructed using a  
609 backprojection algorithm in viewRSOM software (v2.3.5.2 iThera Medical GmbH) with motion  
610 correction for *in vivo* images with a voxel size of 20 x 20 x 4  $\mu\text{m}^3$  (X,Y,Z). To reduce background  
611 noise and artefacts from the data acquisition process, reconstructed images were subjected  
612 to a high-pass filter, to remove echo noise, followed by a Wiener filter in MATLAB (v2020b,  
613 MathWorks, Natick, MA, USA) to remove stochastic noise. Then, a built-in slice-wise  
614 background correction (Sternberg, 1983) was performed in Fiji(Schindelin et al., 2012) to  
615 achieve a homogenous background intensity (see exemplars of each pre-processing step in  
616 **Supplementary Figure 6**).

## 617 **Image segmentation using auto-thresholding or a random forest classifier**

618 Using two common tools adopted in the life sciences, we tested both a rule-based  
619 moment preserving thresholding method (included in Fiji v2.1.0) and a learning-based  
620 segmentation method based on random forest classifiers (with ilastik v1.3.3 (Berg et al.,  
621 2019)). These popular packages were chosen to enable widespread application of our  
622 findings. Moment preserving thresholding, referred to as *auto-thresholding* (AT) for the  
623 remainder of this work, computes the intensity moments of an image and segments the image  
624 while preserving these moments (Tsai, 1985). Training of the random forest (RF) backend was  
625 performed on 3D voxel features in labelled regions, including intensity features, as with the  
626 AT method, combined with edge filters, to account for the intensity gradient between vessels  
627 and background, and texture descriptors, to discern artefacts in the background from the  
628 brighter and more uniform vessel features, each evaluated at different scales (up to a sigma  
629 of 5.0).

630 A key consideration in the machine learning-based segmentation is the preparation of  
631 training and testing data (**Supplementary Table 2**). For the *in silico* ground truth L-net data,  
632 all voxel labels are known. All vessel labels were used for training, however, only partial  
633 background labels were supplied to minimise computational expense by labelling the 10 voxel  
634 radius surrounding all vessels as well as 3 planes parallel to the Z-axis (edges and middle) as  
635 background (**Supplementary Figure 7A,B**). For the phantom data, manual segmentation of  
636 the strings from background was performed to provide ground truth. Strings were segmented  
637 in all slices on which they appeared and background was segmented tightly around the string  
638 (**Supplementary Figure 7C**). For the *in vivo* tumour data, manual segmentation of vessels  
639 was made by a junior user (TLL) supervised by an experienced user (ELB), including images  
640 of varying signal-to-noise ratio (SNR) to increase the robustness of the algorithm for  
641 application in a range of unseen data. Up to 10 XY slices per image stack in the training  
642 dataset were segmented with pencil size 1 at different depths to account for depth-dependent  
643 SNR differences (**Supplementary Figure 7D**).

644 Between pre-processing and segmentation, feature enhancement was tested as a  
645 variable in our segmentation pipeline. In Fiji, we adapted a modified version of Sato filtering  
646 ( $\alpha=0.25$ ) (Sato et al., 1998) to calculate vesselness from Hessian matrix eigenvalues (Frangi  
647 et al., 1998) across multiple scales. Five scales in a linear Gaussian normalized scale space  
648 were used, from which the maximal response was measured to produce the final vesselness  
649 filtered images (20, 40, 60, 80, and 100  $\mu\text{m}$ ) (Sato et al., 1998).

650 Finally, all segmented images (either from Fiji or ilastik) were passed through a built-  
651 in 3D median filter in Fiji, to remove impulse noises (**Supplementary Figure 8**). To summarise  
652 the pipeline (**Figure 1**), the methods under test for all datasets were:

- 653 1. Auto-thresholding using a moment preserving method (AT);
- 654 2. Auto-thresholding using a moment preserving method with vesselness filtering pre-  
655 segmentation (AT+VF);

656 3. Random forest classifier (RF);

657 4. Random forest classifier with vesselness filtering pre-segmentation (RF+VF).

658 Computation times are summarised in Supplementary Table 3.

### 659 **Extracting tumour ROIs using a 3D CNN**

660 To analyse the tumour data in isolation from the surrounding tissue required  
661 delineation of tumour regions of interest (ROIs). To achieve this, we trained a 3D convolutional  
662 neural network (CNN) to fully automate extraction of tumour ROIs from PAI volumes. The 3D  
663 CNN is based on the U-Net architecture (Ronneberger et al., 2015) extended for volumetric  
664 delineation (Çiçek et al., 2016). Details on the CNN architecture and training are provided in  
665 the **Supplementary Materials** and **Supplementary Figures 9-10**.

### 666 **Network Structure and Topological Data Analysis**

667 Topological data analysis (TDA) of the vascular networks was performed using  
668 previously reported software that performs TDA and structural analyses on vasculature  
669 (Chung et al., 2019; Stolz et al., 2020). Prior to these analyses, segmented image volumes  
670 were skeletonised using the open-source package Russ-learn (Bates, 2017, 2018). Our  
671 vascular descriptors comprised a set of statistical descriptors: vessel diameters and lengths,  
672 vessel tortuosity (sum-of-angles measure, SOAM) and curvature (chord-to-length ratio, CLR).  
673 In addition, the following descriptors were used to define network topology: the number of  
674 connected components (Betti number  $\beta_0$ ) and looping structures (1D holes, Betti number  $\beta_1$ ).  
675 Full descriptions of the vascular descriptors are provided in **Supplementary Table 1** while  
676 outputs are shown in **Supplementary Tables 4-7**.

### 677 **Immunohistochemistry**

678 For *ex vivo* validation, formalin-fixed paraffin-embedded (FFPE) tumour tissues were  
679 sectioned. Following deparaffinising and rehydration, IHC was performed for the following  
680 antibodies: CD31 (anti-mouse 77699, Cell signalling, London, UK),  $\alpha$ -smooth muscle actin

681 (ASMA) (anti-mouse ab5694, abcam, Cambridge, UK), carbonic anhydrase-IX (CAIX) (anti-  
682 human AB1001, Bioscience Slovakia, Bratislava, Slovakia) at 1:100, 1:500 and 1:1000,  
683 respectively, using a BOND automated stainer with a bond polymer refine detection kit (Leica  
684 Biosystems) and 3,3'-diaminobenzadine as a substrate. Stained FFPE sections were scanned  
685 at 20x magnification using an Aperio ScanScope (Leica Biosystems, Milton Keynes, UK) and  
686 analysed using ImageScope software (Leica Biosystems) or HALO Software (v2.2.1870,  
687 Indica Labs, Albuquerque, NM, USA). ROIs were drawn over the whole viable tumour area  
688 and built-in algorithms customised to analyse the following: CD31 positive area ( $\mu\text{m}^2$ )  
689 normalised to the ROI area ( $\mu\text{m}^2$ ) (referred to as CD31 vessel area), area of CD31 positive  
690 pixels ( $\mu\text{m}^2$ ) colocalised on adjacent serial section with ASMA positive pixels/CD31 positive  
691 area ( $\mu\text{m}^2$ ) (reported as ASMA vessel coverage (%)) and CAIX positive pixel count per total  
692 ROI pixel count (reported as CAIX (%)).

### 693 **Statistical analysis**

694 Statistical analyses were conducted using Prism (v9, GraphPad Software, San Diego,  
695 CA, USA) and R (v4.0.1(R Core, 2021), R Foundation, Vienna, Austria). We used the mean  
696 square error and R-squared statistics to quantify the accuracy and strength of the relationship  
697 between the segmented networks to the ground truth L-nets. For each outcome of interest,  
698 we predicted the ground truth (on a scale compatible with the normality assumption according  
699 to model checks) by means of each method estimates through a linear model. As model  
700 performance statistics are typically overestimated when assessing the model fit on the same  
701 data used to estimate the model parameters, we used bootstrapping (R = 500) to correct for  
702 the optimism bias and obtain unbiased estimates (Harrell, 2016). Bland-Altman plots were  
703 produced for each paired comparison of segmented volume to the ground truth volume in L-  
704 nets and associated bias and limits of agreement (LOA) are reported. For L-nets, F1 scores  
705 were calculated (Dice, 1945). PAI quality pre-segmentation was quantified by measuring SNR,  
706 defined as the mean of signal over the standard deviation of the background signal.



707 Comparisons of string volume, as well as SNR, were completed using one-way ANOVA with  
708 Tukey multiplicity correction.

709 For each outcome of interest, *in vivo* data was analysed as follows: A linear mixed  
710 effect model was fitted on a response scale (log, square root or cube root) compatible with the  
711 normality assumption according to model checks with the segmentation methods as a 4-level  
712 fixed predictor and animal as random effect, to take the within mouse dependence into  
713 account. Noting that the residual variance was sometimes different for each segmentation  
714 group, we also fitted a heteroscedastic linear mixed effect allowing the variance to be a  
715 function of the segmentation group. The results of the heteroscedastic model were preferred  
716 to results of the homoscedastic model when the likelihood ratio test comparing both models  
717 led to a p-value <0.05. Two multiplicity corrections were performed to achieve a 5% family-  
718 wise error rate for each dataset: For each outcome, a parametric multiplicity correction on the  
719 segmentation method parameters was first used (Bretz et al., 2010). A conservative Bonferroni  
720 p-value adjustment was then added to it to account for the number of outcomes in the entire  
721 *in vivo* dataset. The following pairwise comparisons were considered: AT vs. AT+VF, AT vs.  
722 RF, RF vs. RF+VF and AT+VF vs. RF+VF. Comparisons of our vascular descriptors between  
723 ER- and ER+ tumours were completed with an unpaired student's t-test. All p-values <0.05  
724 after multiplicity correction were considered statistically significant.

## 725 **Code Availability**

726 Code to generate synthetic vascular trees (LNets) is available on GitHub  
727 (<https://github.com/psweens/V-System>). *In silico* photoacoustic simulations were performed  
728 using the SIMPA toolkit (<https://github.com/CAMI-DKFZ/simpa>). Both the trained 3D CNN to  
729 extract tumour ROIs from RSOM images (<https://github.com/psweens/Predict-RSOM-ROI>)  
730 and vascular TDA package are available on GitHub ([https://github.com/psweens/Vascular-](https://github.com/psweens/Vascular-TDA)  
731 [TDA](#)).

## 732 **Data Availability**

733 Exemplar datasets for the *in silico*, phantom, and *in vivo* data can be found at  
734 <https://doi.org/10.17863/CAM.78208>. The authors declare that all data supporting the findings  
735 of this study is available upon request.

## 736 **ACKNOWLEDGEMENTS**

737 ELM, PWS, TLL, JG, LH, DLC, and SEB acknowledge the support from Cancer Research UK  
738 under grant numbers C14303/A17197, C9545/A29580, C47594/A16267, C197/A16465,  
739 C47594/A29448, and Cancer Research UK RadNet Cambridge under the grant number  
740 C17918/A28870. PWS acknowledges the support of the Wellcome Trust and University of  
741 Cambridge under the grant number RG89305. TLL is supported by the Cambridge Trust. LH  
742 is funded from NPL's MedAccel programme financed by the Department of Business, Energy  
743 and Industrial Strategy's Industrial Strategy Challenge Fund. BJS, HMB, and HAH are  
744 members of the Centre for Topological Data Analysis, funded by the EPSRC grant  
745 (EP/R018472/1). We thank the Cancer Research UK Cambridge Institute Biological  
746 Resources Unit, Imaging Core, Histopathological Core, Preclinical Genome Editing Core,  
747 Light Microscopy and Research Instrumentation and Cell Services for their support in  
748 conducting this research. Particular thanks go to Cara Brodie in the Histopathology Core for  
749 analyses support. ELB and SEB would like to thank Prof. Carlos Caldas, Dr Alejandra Bruna  
750 and Dr Wendy Greenwood for providing PDX tissue from their biobank at the CRUK  
751 Cambridge Institute and for assisting in the establishment of a sub-biobank that contributed  
752 the *in vivo* data presented in this manuscript.

753

## 754 **COMPETING INTERESTS**

755 The authors have no conflict of interest related to the present manuscript to disclose.

756

757 **AUTHOR CONTRIBUTIONS**

758 Conceptualization: PWS, ELB, TLL, SEB

759 Methodology: PWS, ELB, LH, TLL, ZH, SEB

760 Software: PWS, BJS, JG, TLL, ZH

761 Validation: PWS, ELB, LH, TLL

762 Formal Analysis: PWS, ELB, TLL

763 Investigation: PWS, ELB, LH, TLL

764 Resources: HAH, HMB

765 Data Curation: PWS, JG, TLL

766 Writing – original draft: PWS, ELB, LH, DLC, TLL, SEB

767 Writing – review & editing: PWS, ELB, JG, LH, BJS, HAH, HMB, TLL, SEB

768 Visualisation: PWS, ELB, TLL

769 Supervision: SEB

770 Project Administration: PWS, SEB

771 Funding Acquisition: PWS, TLL, SEB

772

773

774

775

776 **REFERENCES**

- 777 \_\_\_\_\_Abadi, M., Agarwal, A., Paul Barham, E. B., Zhifeng Chen, Craig Citro, Greg S.  
778 Corrado, A. D., Jeffrey Dean, Matthieu Devin, Sanjay Ghemawat, I. G., Andrew Harp, Geoffrey  
779 Irving, Michael Isard, Rafal Jozefowicz, Y. J., Lukasz Kaiser, Manjunath Kudlur, Josh  
780 Levenberg, Dan Mané, M. S., Rajat Monga, Sherry Moore, Derek Murray, Chris Olah, J. S.,  
781 Benoit Steiner, Ilya Sutskever, Kunal Talwar, P. T., Vincent Vanhoucke, Vijay Vasudevan, F.  
782 V., Oriol Vinyals, Pete Warden, Martin Wattenberg, M. W., & Yuan Yu, and X. Z. (2015).  
783 TensorFlow: Large-scale machine learning on heterogeneous systems. *12th USENIX*  
784 *Symposium on Operating Systems Design and Implementation*, 265–278.  
785 *Autonomio Talos*. (2019).  
786 Barlow, K. D., Sanders, A. M., Soker, S., Ergun, S., & Metheny-Barlow, L. J. (2013).  
787 Pericytes on the tumor vasculature: jekyll or hyde? *Cancer Microenvironment : Official*  
788 *Journal of the International Cancer Microenvironment Society*, 6(1), 1–17.  
789 <https://doi.org/10.1007/s12307-012-0102-2>  
790 Bates, R. (2017). *Learning to Extract Tumour Vasculature: Techniques in Machine Learning*  
791 *for Medical Image Analysis*. University of Oxford.  
792 Bates, R. (2018). *Russ-learn: set of tools for application and training of deep learning*  
793 *methods for image segmentation and vessel analysis*. GitLab.  
794 Beard, P. (2011). Biomedical Photoacoustic Imaging. *Interface Focus*, 1(4), 602–631.  
795 <https://doi.org/10.1098/rsfs.2011.0028>  
796 Berg, S., Kutra, D., Kroeger, T., Straehle, C. N., Kausler, B. X., Haubold, C., Schiegg, M.,  
797 Ales, J., Beier, T., Rudy, M., Eren, K., Cervantes, J. I., Xu, B., Beuttenmueller, F.,  
798 Wolny, A., Zhang, C., Koethe, U., Hamprecht, F. A., & Kreshuk, A. (2019). ilastik:  
799 interactive machine learning for (bio)image analysis. *Nature Methods*, 16(12), 1226–  
800 1232. <https://doi.org/10.1038/s41592-019-0582-9>  
801 Bresenham, J. E. (1965). Algorithm for computer control of a digital plotter. *IBM Systems*  
802 *Journal*, 4(1). <https://doi.org/10.1147/sj.41.0025>  
803 Bretz, F., Hothorn, T., & Westfall, P. (2010). *Multiple comparisons Using R*. Chapman and

- 804 Hall/CRC. <https://doi.org/10.1201/9781420010909>
- 805 Brown, E., Brunker, J., & Bohndiek, S. E. (2019). Photoacoustic imaging as a tool to probe  
806 the tumour microenvironment. *Disease Models & Mechanisms*, 12(7),  
807 dmm039636. <https://doi.org/10.1242/dmm.039636>
- 808 Bruna, A., Rueda, O. M., Greenwood, W., Batra, A. S., Callari, M., Batra, R. N., Pogrebniak,  
809 K., Sandoval, J., Cassidy, J. W., Tufegdzcic-Vidakovic, A., Sammut, S.-J., Jones, L.,  
810 Provenzano, E., Baird, R., Eirew, P., Hadfield, J., Eldridge, M., McLaren-Douglas, A.,  
811 Barthorpe, A., ... Caldas, C. (2016). A Biobank of Breast Cancer Explants with  
812 Preserved Intra-tumor Heterogeneity to Screen Anticancer Compounds. *Cell*, 167(1),  
813 260-274.e22. <https://doi.org/10.1016/j.cell.2016.08.041>
- 814 Chollet, F., & Others. (2015). *Keras*. Keras.io.
- 815 Chung, M. K., Lee, H., DiChristofano, A., Ombao, H., & Solo, V. (2019). Exact topological  
816 inference of the resting-state brain networks in twins. *Network Neuroscience*, 3(3), 674–  
817 694. [https://doi.org/10.1162/NETN\\_A\\_00091](https://doi.org/10.1162/NETN_A_00091)
- 818 Çiçek, Ö., Abdulkadir, A., Lienkamp, S. S., Brox, T., & Ronneberger, O. (2016). 3D U-net:  
819 Learning dense volumetric segmentation from sparse annotation. *Medical Image*  
820 *Computing and Computer-Assisted Intervention – MICCAI 2016*. *MICCAI 2016. Lecture*  
821 *Notes in Computer Science*, 9901. [https://doi.org/10.1007/978-3-319-46723-8\\_49](https://doi.org/10.1007/978-3-319-46723-8_49)
- 822 Corliss, B. A., Mathews, C., Doty, R., Rohde, G., & Peirce, S. M. (2019). Methods to label,  
823 image, and analyze the complex structural architectures of microvascular networks.  
824 *Microcirculation (New York, N.Y. : 1994)*, 26(5), e12520–e12520.  
825 <https://doi.org/10.1111/micc.12520>
- 826 Crum, W. R., Camara, O., & Hill, D. L. G. (2006). Generalized overlap measures for  
827 evaluation and validation in medical image analysis. *IEEE Transactions on Medical*  
828 *Imaging*, 25(11), 1451–1461. <https://doi.org/10.1109/TMI.2006.880587>
- 829 Dantuma, M., van Dommelen, R., & Manohar, S. (2019). Semi-anthropomorphic  
830 photoacoustic breast phantom. *Biomed. Opt. Express*, 10(11), 5921–5939.  
831 <https://doi.org/10.1364/BOE.10.005921>

- 832 Dice, L. R. (1945). Measures of the Amount of Ecologic Association Between Species.  
833 *Ecology*, 26(3), 297–302. [https://doi.org/https://doi.org/10.2307/1932409](https://doi.org/10.2307/1932409)
- 834 Epah, J., Pálfi, K., Dienst, F. L., Malacarne, P. F., Bremer, R., Salamon, M., Kumar, S., Jo,  
835 H., Schürmann, C., & Brandes, R. P. (2018). 3D imaging and quantitative analysis of  
836 vascular networks: A comparison of ultramicroscopy and micro-computed tomography.  
837 *Theranostics*, 8(8), 2117–2133. <https://doi.org/10.7150/THNO.22610>
- 838 Frangi, A. F., Niessen, W. J., Vincken, K. L., & Viergever, M. A. (1998). Multiscale vessel  
839 enhancement filtering. In W. M. Wells, A. Colchester, & S. Delp (Eds.), *Medical Image*  
840 *Computing and Computer-Assisted Intervention --- MICCAI'98* (pp. 130–137). Springer  
841 Berlin Heidelberg.
- 842 Galarreta-Valverde, M. A. (2012). *Geração de redes vasculares sintéticas tridimensionais*  
843 *utilizando sistemas de Lindenmayer estocásticos e parametrizados* [Instituto de  
844 Matemática e Estatística]. <https://doi.org/10.11606/D.45.2012.tde-30112012-172822>
- 845 Galarreta-Valverde, M. A., Macedo, M. M. G., Mekkaoui, C., & Jackowski, M. P. (2013).  
846 Three-dimensional synthetic blood vessel generation using stochastic L-systems.  
847 *Medical Imaging 2013: Image Processing*, 86691I. <https://doi.org/10.1117/12.2007532>
- 848 Haedicke, K., Agemy, L., Omar, M., Bereznoi, A., Roberts, S., Longo-Machado, C., Skubal,  
849 M., Nagar, K., Hsu, H.-T., Kim, K., Reiner, T., Coleman, J., Ntziachristos, V., Scherz, A.,  
850 & Grimm, J. (2020). High-resolution optoacoustic imaging of tissue responses to  
851 vascular-targeted therapies. *Nature Biomedical Engineering*, 4(3), 286–297.  
852 <https://doi.org/10.1038/s41551-020-0527-8>
- 853 Hanahan, D., & Weinberg, R. a. (2011). Hallmarks of cancer: the next generation. *Cell*,  
854 144(5), 646–674. <https://doi.org/10.1016/j.cell.2011.02.013>
- 855 Harrell, F. E. (2016). *Regression modeling strategies*. Springer International Publishing.
- 856 Hlushchuk, R., Haberthür, D., & Djonov, V. (2019). Ex vivo microangiOCT: Advances in  
857 microvascular imaging. *Vascular Pharmacology*, 112, 2–7.  
858 <https://doi.org/10.1016/J.VPH.2018.09.003>
- 859 Imai, T., Muz, B., Yeh, C.-H., Yao, J., Zhang, R., Azab, A. K., & Wang, L. (2017). Direct

- 860 measurement of hypoxia in a xenograft multiple myeloma model by optical-resolution  
861 photoacoustic microscopy. *Cancer Biology & Therapy*, 18(2), 101–105.  
862 <https://doi.org/10.1080/15384047.2016.1276137>
- 863 Jährling, N., Becker, K., & Dodt, H.-U. (2009). 3D-reconstruction of blood vessels by  
864 ultramicroscopy. *Organogenesis*, 5(4), 227–230. <https://doi.org/10.4161/org.5.4.10403>
- 865 Janek Gröhl, Kris K. Dreher, Melanie Schellenberg, Alexander Seitel, L. M.-H. (2021).  
866 SIMPA: an open source toolkit for simulation and processing of photoacoustic images.  
867 *Photons Plus Ultrasound: Imaging and Sensing 2021*.
- 868 Jia, D., & Zhuang, X. (2021). Learning-based algorithms for vessel tracking: A review.  
869 *Computerized Medical Imaging and Graphics*, 89, 101840.  
870 <https://doi.org/https://doi.org/10.1016/j.compmedimag.2020.101840>
- 871 Joseph, J., Tomaszewski, M. R., Quiros-Gonzalez, I., Weber, J., Brunker, J., & Bohndiek, S.  
872 E. (2017). Evaluation of Precision in Optoacoustic Tomography for Preclinical Imaging  
873 in Living Subjects. *Journal of Nuclear Medicine*, 58(5), 807–814.
- 874 Kelch, I. D., Bogle, G., Sands, G. B., Phillips, A. R. J., LeGrice, I. J., & Rod Dunbar, P.  
875 (2015). Organ-wide 3D-imaging and topological analysis of the continuous  
876 microvascular network in a murine lymph node. *Scientific Reports*, 5(1), 16534.  
877 <https://doi.org/10.1038/srep16534>
- 878 Keller, P. J., & Dodt, H. U. (2012). Light sheet microscopy of living or cleared specimens. In  
879 *Current Opinion in Neurobiology* (Vol. 22, Issue 1, pp. 138–143). Curr Opin Neurobiol.  
880 <https://doi.org/10.1016/j.conb.2011.08.003>
- 881 Krig, S., & Krig, S. (2014). Ground Truth Data, Content, Metrics, and Analysis. In *Computer*  
882 *Vision Metrics* (pp. 283–311). Apress. [https://doi.org/10.1007/978-1-4302-5930-5\\_7](https://doi.org/10.1007/978-1-4302-5930-5_7)
- 883 Krishna Priya, S., Nagare, R. P., Sneha, V. S., Sidhanth, C., Bindhya, S., Manasa, P., &  
884 Ganesan, T. S. (2016). Tumour angiogenesis—Origin of blood vessels. *International*  
885 *Journal of Cancer*, 139(4), 729–735. <https://doi.org/10.1002/ijc.30067>
- 886 Lao, Y., Xing, D., Yang, S., & Xiang, L. (2008). Noninvasive photoacoustic imaging of the  
887 developing vasculature during early tumor growth. *Physics in Medicine & Biology*,

- 888 53(15), 4203. <http://stacks.iop.org/0031-9155/53/i=15/a=013>
- 889 Lindenmayer, A. (1968). Mathematical models for cellular interactions in development I.  
890 Filaments with one-sided inputs. *Journal of Theoretical Biology*, 18(3), 280–299.  
891 [https://doi.org/10.1016/0022-5193\(68\)90079-9](https://doi.org/10.1016/0022-5193(68)90079-9)
- 892 Michiels, C., Tellier, C., & Feron, O. (2016). Cycling hypoxia: A key feature of the tumor  
893 microenvironment. *Biochimica et Biophysica Acta (BBA) - Reviews on Cancer*, 1866(1),  
894 76–86. <https://doi.org/https://doi.org/10.1016/j.bbcan.2016.06.004>
- 895 Moccia, S., De Momi, E., El Hadji, S., & Mattos, L. S. (2018). Blood vessel segmentation  
896 algorithms — Review of methods, datasets and evaluation metrics. *Computer Methods  
897 and Programs in Biomedicine*, 158, 71–91.  
898 <https://doi.org/https://doi.org/10.1016/j.cmpb.2018.02.001>
- 899 Nagy, J. A., & Dvorak, H. F. (2012). Heterogeneity of the tumor vasculature: the need for  
900 new tumor blood vessel type-specific targets. *Clinical & Experimental Metastasis*, 29(7),  
901 657–662. <https://doi.org/10.1007/s10585-012-9500-6>
- 902 Ntziachristos, V. (2010). Going deeper than microscopy: the optical imaging frontier in  
903 biology. *Nature Methods*, 7(8), 603–614. <https://doi.org/10.1038/nmeth.1483>
- 904 Ntziachristos, V., Ripoll, J., Wang, L. V., & Weissleder, R. (2005). Looking and listening to  
905 light: the evolution of whole-body photonic imaging. *Nature Biotechnology*, 23, 313.  
906 <http://dx.doi.org/10.1038/nbt1074>
- 907 Omar, M., Aguirre, J., & Ntziachristos, V. (2019). Optoacoustic mesoscopy for biomedicine.  
908 *Nature Biomedical Engineering*, 3(5), 354–370. <https://doi.org/10.1038/s41551-019-0377-4>
- 909 0377-4
- 910 Omar, M., Gateau, J., & Ntziachristos, V. (2013). Raster-scan optoacoustic mesoscopy in  
911 the 25–125 MHz range. *Opt. Lett.*, 38(14), 2472–2474.  
912 <https://doi.org/10.1364/OL.38.002472>
- 913 Omar, M., Schwarz, M., Soliman, D., Symvoulidis, P., & Ntziachristos, V. (2015). Pushing  
914 the Optical Imaging Limits of Cancer with Multi-Frequency-Band Raster-Scan  
915 Optoacoustic Mesoscopy (RSOM). *Neoplasia*, 17(2), 208–214.



- 916 <https://doi.org/https://doi.org/10.1016/j.neo.2014.12.010>
- 917 Omar, M., Soliman, D., Gateau, J., & Ntziachristos, V. (2014). Ultrawideband reflection-  
918 mode optoacoustic mesoscopy. *Optics Letters*, 39(13), 3911–3914.  
919 <https://doi.org/10.1364/OL.39.003911>
- 920 Orlova, A., Sirotkina, M., Smolina, E., Elagin, V., Kovalchuk, A., Turchin, I., & Subochev, P.  
921 (2019). Raster-scan optoacoustic angiography of blood vessel development in colon  
922 cancer models. *Photoacoustics*, 13, 25–32. <https://doi.org/10.1016/j.pacs.2018.11.005>
- 923 Oruganti, T., Laufer, J. G., & Treeby, B. E. (2013). Vessel filtering of photoacoustic images.  
924 *Proc.SPIE*, 8581. <https://doi.org/10.1117/12.2005988>
- 925 Quiros-Gonzalez, I., Tomaszewski, M. R., Aitken, S. J., Ansel-Bollepalli, L., McDuffus, L.-A.,  
926 Gill, M., Hacker, L., Brunker, J., & Bohndiek, S. E. (2018). Optoacoustics delineates  
927 murine breast cancer models displaying angiogenesis and vascular mimicry. *British*  
928 *Journal of Cancer*, 118(8), 1098–1106. <https://doi.org/10.1038/s41416-018-0033-x>
- 929 R Core, T. (2021). *R: A language and environment for statistical computing*. R Foundation  
930 for Statistical Computing, Vienna, Austria. <https://www.r-project.org/>
- 931 Raunonen, P., & Tarvainen, T. (2018). Segmentation of vessel structures from  
932 photoacoustic images with reliability assessment. *Biomedical Optics Express*, 9(7),  
933 2887–2904. <https://doi.org/10.1364/BOE.9.002887>
- 934 Rebling, J., Greenwald, M. B.-Y., Wietecha, M., Werner, S., & Razansky, D. (2021). Long-  
935 Term Imaging of Wound Angiogenesis with Large Scale Optoacoustic Microscopy.  
936 *Advanced Science*, 8(13), 2004226. <https://doi.org/10.1002/ADVS.202004226>
- 937 Ronneberger, O., Fischer, P., & Brox, T. (2015). U-Net: Convolutional Networks for  
938 Biomedical Image Segmentation. *Medical Image Computing and Computer-Assisted*  
939 *Intervention – MICCAI 2015. MICCAI 2015. Lecture Notes in Computer Science*, 9351,  
940 234–241. <https://doi.org/10.1007/978-3-319-24574-4>
- 941 Rozenberg, G., & Arto Salomaa (Eds.). (1992). *Lindenmayer Systems: Impacts on*  
942 *theoretical computer science, computer graphics, and development biology*. Springer-  
943 Verlag Berlin Heidelberg. <https://doi.org/10.1007/978-3-642-58117-5>

- 944 Sato, Y., Nakajima, S., Shiraga, N., Atsumi, H., Yoshida, S., Koller, T., Gerig, G., & Kikinis,  
945 R. (1998). Three-dimensional multi-scale line filter for segmentation and visualization of  
946 curvilinear structures in medical images. *Medical Image Analysis*, 2(2), 143–168.  
947 [https://doi.org/https://doi.org/10.1016/S1361-8415\(98\)80009-1](https://doi.org/https://doi.org/10.1016/S1361-8415(98)80009-1)
- 948 Schindelin, J., Arganda-Carreras, I., Frise, E., Kaynig, V., Longair, M., Pietzsch, T.,  
949 Preibisch, S., Rueden, C., Saalfeld, S., Schmid, B., Tinevez, J.-Y., White, D. J.,  
950 Hartenstein, V., Eliceiri, K., Tomancak, P., & Cardona, A. (2012). Fiji: an open-source  
951 platform for biological-image analysis. *Nature Methods*, 9(7), 676–682.  
952 <https://doi.org/10.1038/nmeth.2019>
- 953 Soetikno, B., Hu, S., Gonzales, E., Zhong, Q., Maslov, K., Lee, J.-M., & Wang, L. V. (2012).  
954 Vessel segmentation analysis of ischemic stroke images acquired with photoacoustic  
955 microscopy. *Proc.SPIE*, 8223. <https://doi.org/10.1117/12.911089>
- 956 Sommer, C., Straehle, C., Kothe, U., & Hamprecht, F. A. (2011). Ilastik: Interactive learning  
957 and segmentation toolkit. *Eighth IEEE International Symposium on Biomedical Imaging*,  
958 230–233. <https://doi.org/10.1109/ISBI.2011.5872394>
- 959 Sternberg, S. R. (1983). Biomedical Image Processing. *Computer*, 16(1), 22–34.  
960 <https://doi.org/10.1109/MC.1983.1654163>
- 961 Stolz, B. J., Kaeppeler, J., Markelc, B., Mech, F., Lipsmeier, F., Muschel, R. J., Byrne, H. M.,  
962 & Harrington, H. A. (2020). Multiscale topology characterises dynamic tumour vascular  
963 networks. In *arXiv*. <https://doi.org/2008.08667>
- 964 Trédan, O., Galmarini, C. M., Patel, K., & Tannock, I. F. (2007). Drug Resistance and the  
965 Solid Tumor Microenvironment. *JNCI: Journal of the National Cancer Institute*, 99(19),  
966 1441–1454. <https://doi.org/10.1093/jnci/djm135>
- 967 Treeby, B. E., & Cox, B. T. (2010). k-Wave: MATLAB toolbox for the simulation and  
968 reconstruction of photoacoustic wave fields. *Journal of Biomedical Optics*, 15(2), 1–12.  
969 <https://doi.org/10.1117/1.3360308>
- 970 Tsai, W.-H. (1985). Moment-preserving thresholding: A new approach. *Computer Vision*,  
971 *Graphics, and Image Processing*, 29(3), 377–393.

- 972 [https://doi.org/https://doi.org/10.1016/0734-189X\(85\)90133-1](https://doi.org/https://doi.org/10.1016/0734-189X(85)90133-1)
- 973 UI Haq, I., Nagaoka, R., Makino, T., Tabata, T., & Saijo, Y. (2016). 3D Gabor wavelet based  
974 vessel filtering of photoacoustic images. In *Conference proceedings: ... Annual*  
975 *International Conference of the IEEE Engineering in Medicine and Biology Society.*  
976 *IEEE Engineering in Medicine and Biology Society. Conference* (Vol. 2016).  
977 <https://doi.org/10.1109/EMBC.2016.7591576>
- 978 Wang, L. V., & Yao, J. (2016). A practical guide to photoacoustic tomography in the life  
979 sciences. *Nature Methods*, *13*(8), 627–638. <https://doi.org/10.1038/nmeth.3925>
- 980 Zhao, F., Chen, Y., Hou, Y., & He, X. (2019). Segmentation of blood vessels using rule-  
981 based and machine-learning-based methods: a review. *Multimedia Systems*, *25*(2),  
982 109–118. <https://doi.org/10.1007/s00530-017-0580-7>
- 983 Zhao, H., Liu, C., Li, K., Chen, N., Zhang, K., Wang, L., Lin, R., Gong, X., Song, L., & Liu, Z.  
984 (2019). Multiscale vascular enhancement filter applied to in vivo morphologic and  
985 functional photoacoustic imaging of rat ocular vasculature. *IEEE Photonics Journal*,  
986 *11*(6). <https://doi.org/10.1109/JPHOT.2019.2948955>
- 987
- 988

989 **Supplementary information for:**

990 Quantification of vascular networks in photoacoustic mesoscopy

991

992 **Authors:**

993 Emma L. Brown<sup>1,2,#</sup>, Thierry L. Lefebvre<sup>1,2,#</sup>, Paul W. Sweeney<sup>1,2,#</sup>, Bernadette J. Stolz<sup>3</sup>, Janek

994 Gröhl<sup>1,2</sup>, Lina Hacker<sup>1,2</sup>, Ziqiang Huang<sup>2</sup> +, Dominique-Laurent Couturier<sup>2</sup>, Heather A.

995 Harrington<sup>3</sup>, Helen M. Byrne<sup>3</sup> and Sarah E. Bohndiek<sup>1,2\*</sup>.

996

997 <sup>1</sup> Department of Physics, University of Cambridge, JJ Thomson Avenue, Cambridge, CB3

998 0HE, U.K.

999

1000 <sup>2</sup> Cancer Research UK Cambridge Institute, University of Cambridge, Robinson Way,

1001 Cambridge, CB2 0RE, U.K.

1002

1003 <sup>3</sup> Mathematical Institute, University of Oxford, Woodstock Road, Oxford, OX2 6GG, U.K.

1004

1005 + Now at: European Molecular Biology Laboratory Imaging Centre, Heidelberg, Germany.

1006

1007 # These authors contributed equally

1008 \* Corresponding author: email [seb53@cam.ac.uk](mailto:seb53@cam.ac.uk), telephone +44 1223 337267.

1009

1010 **Keywords:** photoacoustic imaging, vasculature, segmentation, topology

1011

1012

1013

1014

## 1015 **Supplementary Materials and Methods**

### 1016 *1. String phantom preparation*

1017 The string phantom used in this study was prepared by mixing 1.5 g agarose (Fluka Analytical,  
1018 05039-500G) in 97.3 mL deionised water in a glass media bottle and heated in a microwave  
1019 until the solution turned clear. After cooling down the solution to 60°C, 2.08 mL of pre-warmed  
1020 intralipid was added to generate a reduced scattering coefficient of 5.0 cm<sup>-1</sup> according to a  
1021 previously characterised recipe (Joseph et al., 2017). The mixture was poured into a 3D-printed  
1022 phantom mould, which was designed in Autodesk Fusion 360 (San Rafael, CA, USA) and  
1023 printed using an Anet A6 Printer with polylactic acid (PLA PRO 1.75mm Fluorescent Yellow  
1024 PLA 3D Printer Filament, 832-0254, RS Components, UK) as a base material.

1025 **Supplementary Figure 2** shows the phantom mould with and without agar.

### 1026 *2. 3D CNN for ROI delineation*

#### 1027 *2.1. Preparation of training data*

1028 Image volumes consist of a series of 8-bit grayscale *Tiffs* (no compression) of 600 x  
1029 600 pixels in the XY-plane and a stack of 700 images in Z, with anisotropic voxels of size 20  
1030 x 20 x 4 μm<sup>3</sup>. Our dataset has a total of 166 PAI volumes, each paired with a corresponding  
1031 binary semi-manually-annotated volume, where a voxel value of 0 and 255 indicates the  
1032 background or tumour ROIs, respectively. The annotated volumes were generated by an  
1033 experienced user, who first identified the top and bottom image containing the tumour in Z.  
1034 Within these upper and lower bounds, ROIs were manually drawn in the XY plane on  
1035 approximately 4 image slices. Bound by these data, a convex hull was extrapolated to  
1036 approximate the ROI in the remaining image slices.

1037 Prior to training, image volumes and binary masks were downsampled to an isotropic  
1038 volume of 256 x 256 x 256 voxels to fit into computer memory. Data was locally standardised  
1039 and normalised to a pixel range between 0 and 1 and the volumes randomly partitioned into  
1040 training, validation, and testing subsets. Here, ~5% of images were allocated for testing, with

1041 the remaining portion split 80:20 for training and validation respectively (8 / 126 / 32 image  
1042 volumes, respectively).

### 1043 *2.2 Neural Network Architecture for ROI delineation*

1044 The 3D CNN is based on the U-Net architecture(Ronneberger et al., 2015) extended  
1045 for volumetric delineation(Çiçek et al., 2016). The structure consists of an encoder, which  
1046 extracts spatial features from a 3D image volume, and a decoder, which constructs a  
1047 segmentation map from these features (**Supplementary Figure 10**). The network architecture  
1048 consists of five convolutional layers. The encoder path contains two 3 x 3 x 3 convolutions  
1049 followed by a rectified linear unit (ReLU) activation for faster convergence and accuracy(Çiçek  
1050 et al., 2016). Each ReLU activation is followed by 2 x 2 x 2 max pooling with strides of two in  
1051 each dimension. For the 3<sup>rd</sup>, 4<sup>th</sup> and 5<sup>th</sup> layers, dropout is applied to reduce segmentation bias  
1052 and ensure segmentation is performed utilising high-level features that may not have been  
1053 considered in our semi-manual ROI annotations.

1054 The decoder path consists of two 3 x 3 x 3 deconvolutions of strides of 2 in each  
1055 dimension, followed by 3 x 3 x 3 convolutions, batch normalisation and ReLU activation. High-  
1056 resolution features were provided via shortcut connections from the same layer in the encoder  
1057 path. The final layer applied an additional 1 x 1 x 1 convolution followed by sigmoid activation  
1058 to ensure the correct number of output channels and range of pixel values [0, 1]. The input  
1059 layer is designed to take  $n$  grayscale (one channel) tumour volumes as input with a pre-defined  
1060 volume (128 x 128 x 128 voxels in X, Y, Z-direction used here). The U-Net binary mask  
1061 prediction contains an equal number of voxels as the input. The CNN was implemented in  
1062 Keras(Chollet & Others, 2015) with the Tensorflow framework(Abadi et al., 2015). The model  
1063 was trained and tested on a Dell Precision 7920 with a Dual Intel Xeon Gold 5120 CPU with  
1064 128 GB RAM and a NVIDIA Quadro GV100 32 GB GPU.

### 1065 *2.3. Hyperparameter Optimisation*

1066 Hyperparameters were optimised and evaluated using Talos(*Autonomio Talos*, 2019),  
1067 a fully-automated hyperparameter tuner for Keras. A random search optimisation strategy was  
1068 deployed using the quantum random method. Here, a probabilistic reduction scheme was  
1069 used to reduce the number of parameter permutations by removing poorly performing  
1070 hyperparameter configurations from the remaining search space after a predefined interval.  
1071 The number of filters used ranged from 16 in the 1<sup>st</sup> layer to 512 in the 5<sup>th</sup>. Dropout at a rate  
1072 of 0.2 was applied in the 3<sup>rd</sup>, 4<sup>th</sup> and 5<sup>th</sup> layers. A Glorot uniform initialiser was used for all  
1073 convolution and deconvolution layers. The model was trained using an Adam optimiser with  
1074 learning and decay rates of  $10^{-5}$  and  $10^{-8}$ , respectively, and the dice coefficient (F1)(Crum et  
1075 al., 2006) used as the loss function.

#### 1076 *2.4. U-Net Training & Predictions*

1077 Training was performed with a batch size of 3 image volumes for a total of 120 epochs  
1078 (**Supplementary Figure 11A**). The fully-trained network achieved an accuracy of 88.3% and  
1079 87.3% on the training and validation sets respectively (**Supplementary Figure 11B**).  
1080 Following training and test, we applied the CNN to the entire set of volumes to compare  
1081 predictions of ROI volume to the ground truth (**Supplementary Figure 11C**). Blood volumes  
1082 were then calculated within the predicted ROIs using the AT method and compared against  
1083 the user annotations (**Supplementary Figure 11D**). We found a significant correlation  
1084 between user annotated and predicted data for both ROI volume (Spearman's rank  
1085 correlation:  $r = 0.821$ ,  $p < 0.0001$ ) and blood volume ( $r = 0.958$ ,  $p < 0.0001$ ), indicating our  
1086 CNN achieves sufficient performance against the experienced user to be applied for extracting  
1087 tumours prior to testing the segmentation pipeline.

#### 1088 *3. Signal-to-noise ratio characterisation*

1089 PAI quality pre-segmentation was quantified by measuring signal-to-noise ratio (SNR), defined  
1090 as the mean of signal over the standard deviation of the background signal. For *in silico* and

1091 in phantom ground truth datasets, the mean of the signal was taken within the binary ground  
1092 truth masks of the images and reported for different depths.

1093

1094

1095



1096 **Supplementary Tables**

1097 **Supplementary Table 1:** Descriptions of our statistical and topological descriptors.

| Descriptor                      | Description                                                                                                                                                                                                       |
|---------------------------------|-------------------------------------------------------------------------------------------------------------------------------------------------------------------------------------------------------------------|
| Connected Components, $\beta_0$ | Number of 0-dimensional topological features, <i>i.e.</i> the number of subgraphs or clusters (vascular subnetworks). Values are normalised with respect to the total number of edges per segmented image volume. |
| Loops, $\beta_1$                | Number of 1-dimensional topological features, <i>i.e.</i> the numbers of looping structures in vascular graph. Values are normalised with respect to the total number of edges per segmented image volume.        |
| Sum-of-angles measure (SOAM)    | The sum of angles between tangents to the curve taken at regular intervals normalised against vessel length, <i>i.e.</i> the average change in angle per unit length.                                             |
| Chord-to-length ratio (CLR)     | The ratio between the Euclidean distance connecting the two ends of a blood vessel and the length of the blood vessel, <i>e.g.</i> a straight vessel has a CLR equal to 1.                                        |

1098

1099 **Supplementary Table 2:** Training and testing dataset split for random forest-based  
 1100 segmentation in ilastik.

| Data             | Ground truth labels                                                                            | Training               | Testing                                                  |
|------------------|------------------------------------------------------------------------------------------------|------------------------|----------------------------------------------------------|
| <i>In silico</i> | Original binary labels of L-net branches and surrounding background                            | 30 L-nets              | 30 L-nets (data in <b>Figures 2 and 3</b> )              |
| <i>In vitro</i>  | Manual labelling of all XY slices containing strings and of surrounding background             | 2 string phantom scans | 5 string phantom scans (data in <b>Figures 4 and 5</b> ) |
| <i>In vivo</i>   | Manual labelling of 10 XY slices per image at distributed depths and of surrounding background | 20 PDX tumour scans    | 14 PDX tumour scans (data in <b>Figures 6-9</b> )        |

1101

1102 **Supplementary Table 3.** Mean computation time in seconds for each segmentation method  
1103 on *in silico*, *in vitro*, and *in vivo* data. Note: Segmentations were performed on a dual Intel  
1104 Xeon E5-2623 v4 2.60 GHz quad-core processor and 64.0 GB of RAM.

| <b>Data</b>      | <b>AT</b> | <b>AT+VF</b> | <b>RF</b> | <b>RF+VF</b> |
|------------------|-----------|--------------|-----------|--------------|
| <i>In silico</i> | 7.4       | 198.1        | 191.1     | 381.8        |
| <i>In vitro</i>  | 12.9      | 219.6        | 1280.0    | 1486.7       |
| <i>In vivo</i>   | 38.4      | 1215.5       | 1500.7    | 2677.8       |

1105

1106

1107 **Supplementary Table 4.** Absolute number of connected components for each L-Net skeleton  
 1108 generated from the ground truth and each segmentation method. Network names are  
 1109 organised based on number of recursive L-Net iterations and index, for example, 'LNet\_i4\_0'  
 1110 is the zeroth network of those with 4 iterations. Note, the number of known branching points  
 1111 is equal to number of iterations minus 3.

| Name       | Ground Truth | AT | AT+VF | RF | RF+VF |
|------------|--------------|----|-------|----|-------|
| LNet_i4_0  | 1            | 17 | 4     | 5  | 3     |
| LNet_i4_1  | 1            | 12 | 1     | 5  | 4     |
| LNet_i4_2  | 1            | 8  | 3     | 3  | 2     |
| LNet_i4_3  | 1            | 23 | 3     | 24 | 111   |
| LNet_i4_4  | 1            | 15 | 1     | 2  | 1     |
| LNet_i6_0  | 1            | 12 | 3     | 10 | 16    |
| LNet_i6_1  | 1            | 21 | 2     | 4  | 6     |
| LNet_i6_2  | 1            | 13 | 3     | 4  | 8     |
| LNet_i6_3  | 1            | 1  | 2     | 3  | 2     |
| LNet_i6_4  | 1            | 21 | 9     | 8  | 4     |
| LNet_i8_0  | 1            | 20 | 9     | 16 | 16    |
| LNet_i8_1  | 1            | 26 | 5     | 16 | 9     |
| LNet_i8_2  | 1            | 12 | 9     | 12 | 5     |
| LNet_i8_3  | 1            | 12 | 7     | 13 | 6     |
| LNet_i8_4  | 1            | 7  | 2     | 14 | 11    |
| LNet_i10_0 | 1            | 30 | 14    | 29 | 21    |
| LNet_i10_1 | 1            | 30 | 12    | 24 | 19    |
| LNet_i10_2 | 1            | 18 | 9     | 24 | 14    |
| LNet_i10_3 | 1            | 40 | 20    | 33 | 34    |
| LNet_i10_4 | 1            | 21 | 21    | 28 | 27    |
| LNet_i12_0 | 1            | 76 | 16    | 49 | 43    |
| LNet_i12_1 | 1            | 68 | 23    | 52 | 52    |
| LNet_i12_2 | 1            | 58 | 24    | 40 | 37    |

|            |   |     |    |     |     |
|------------|---|-----|----|-----|-----|
| LNet_i12_3 | 1 | 49  | 19 | 83  | 72  |
| LNet_i12_4 | 1 | 58  | 26 | 68  | 53  |
| LNet_i14_0 | 1 | 88  | 39 | 155 | 103 |
| LNet_i14_1 | 1 | 81  | 45 | 112 | 100 |
| LNet_i14_2 | 1 | 69  | 36 | 93  | 79  |
| LNet_i14_3 | 1 | 91  | 46 | 87  | 89  |
| LNet_i14_4 | 1 | 104 | 34 | 116 | 74  |

1112

1113

1114

1115

1116

1117

1118

1119

1120

1121

1122

1123

1124

1125

1126

1127

1128 **Supplementary Table 5.** Absolute number of loops for each L-Net skeleton generated from  
 1129 the ground truth and each segmentation method. Network names are organised based on  
 1130 number of recursive L-Net iterations and index, for example, 'LNet\_i4\_0' is the zeroth network  
 1131 of those with 4 iterations. Note, the number of known branching points is equal to number of  
 1132 iterations minus 3.

| Name       | Ground Truth | AT | AT+VF | RF | RF+VF |
|------------|--------------|----|-------|----|-------|
| LNet_i4_0  | 0            | 46 | 0     | 2  | 2     |
| LNet_i4_1  | 0            | 27 | 0     | 4  | 16    |
| LNet_i4_2  | 0            | 42 | 0     | 0  | 8     |
| LNet_i4_3  | 1            | 45 | 13    | 67 | 86    |
| LNet_i4_4  | 0            | 41 | 0     | 1  | 11    |
| LNet_i6_0  | 0            | 54 | 1     | 12 | 27    |
| LNet_i6_1  | 1            | 28 | 0     | 13 | 11    |
| LNet_i6_2  | 1            | 63 | 7     | 22 | 72    |
| LNet_i6_3  | 0            | 6  | 0     | 0  | 0     |
| LNet_i6_4  | 2            | 47 | 0     | 9  | 8     |
| LNet_i8_0  | 4            | 68 | 1     | 33 | 22    |
| LNet_i8_1  | 2            | 21 | 0     | 4  | 1     |
| LNet_i8_2  | 2            | 53 | 0     | 2  | 11    |
| LNet_i8_3  | 1            | 86 | 0     | 8  | 13    |
| LNet_i8_4  | 1            | 40 | 0     | 1  | 0     |
| LNet_i10_0 | 4            | 0  | 0     | 0  | 0     |
| LNet_i10_1 | 20           | 14 | 0     | 0  | 1     |
| LNet_i10_2 | 9            | 20 | 0     | 0  | 0     |
| LNet_i10_3 | 9            | 33 | 0     | 14 | 12    |
| LNet_i10_4 | 11           | 7  | 0     | 1  | 1     |
| LNet_i12_0 | 73           | 9  | 4     | 24 | 12    |
| LNet_i12_1 | 123          | 37 | 5     | 25 | 25    |
| LNet_i12_2 | 106          | 32 | 7     | 35 | 36    |

|            |     |    |    |    |    |
|------------|-----|----|----|----|----|
| LNet_i12_3 | 30  | 4  | 1  | 1  | 1  |
| LNet_i12_4 | 62  | 2  | 1  | 8  | 13 |
| LNet_i14_0 | 353 | 16 | 9  | 18 | 13 |
| LNet_i14_1 | 426 | 43 | 15 | 58 | 43 |
| LNet_i14_2 | 395 | 19 | 9  | 19 | 20 |
| LNet_i14_3 | 376 | 74 | 15 | 58 | 51 |
| LNet_i14_4 | 304 | 29 | 12 | 20 | 29 |

1133

1134

1135 **Supplementary Table 6.** The number of edges for each L-Net skeleton generated from the  
1136 ground truth and each segmentation method. Network names are organised based on number  
1137 of recursive L-Net iterations and index, for example, 'LNet\_i4\_0' is the zeroth network of those  
1138 with 4 iterations. Note, the number of known branching points is equal to number of iterations  
1139 minus 3.

1140

| Name       | Ground Truth | AT  | AT+VF | RF  | RF+VF |
|------------|--------------|-----|-------|-----|-------|
| LNet_i4_0  | 3            | 160 | 4     | 19  | 10    |
| LNet_i4_1  | 3            | 122 | 3     | 24  | 59    |
| LNet_i4_2  | 3            | 144 | 3     | 5   | 32    |
| LNet_i4_3  | 7            | 177 | 49    | 247 | 420   |
| LNet_i4_4  | 3            | 136 | 3     | 9   | 38    |
| LNet_i6_0  | 15           | 217 | 18    | 63  | 122   |
| LNet_i6_1  | 18           | 134 | 12    | 55  | 60    |
| LNet_i6_2  | 19           | 222 | 34    | 94  | 236   |
| LNet_i6_3  | 15           | 37  | 14    | 15  | 14    |
| LNet_i6_4  | 21           | 167 | 11    | 50  | 43    |
| LNet_i8_0  | 65           | 267 | 34    | 172 | 130   |
| LNet_i8_1  | 65           | 139 | 19    | 77  | 57    |
| LNet_i8_2  | 69           | 227 | 35    | 68  | 85    |
| LNet_i8_3  | 62           | 315 | 33    | 85  | 92    |
| LNet_i8_4  | 62           | 148 | 18    | 44  | 37    |
| LNet_i10_0 | 238          | 114 | 46    | 113 | 101   |
| LNet_i10_1 | 251          | 161 | 54    | 116 | 111   |
| LNet_i10_2 | 196          | 164 | 43    | 100 | 86    |
| LNet_i10_3 | 179          | 241 | 64    | 197 | 183   |
| LNet_i10_4 | 253          | 138 | 69    | 151 | 138   |
| LNet_i12_0 | 687          | 211 | 97    | 332 | 282   |
| LNet_i12_1 | 669          | 283 | 103   | 296 | 296   |

|            |      |     |     |     |     |
|------------|------|-----|-----|-----|-----|
| LNet_i12_2 | 698  | 310 | 130 | 388 | 349 |
| LNet_i12_3 | 794  | 188 | 84  | 182 | 197 |
| LNet_i12_4 | 662  | 150 | 79  | 249 | 246 |
| LNet_i14_0 | 2359 | 317 | 175 | 524 | 396 |
| LNet_i14_1 | 2226 | 463 | 262 | 642 | 591 |
| LNet_i14_2 | 2037 | 261 | 158 | 461 | 427 |
| LNet_i14_3 | 1707 | 459 | 174 | 506 | 461 |
| LNet_i14_4 | 1936 | 345 | 153 | 462 | 460 |

1141

1142



1143 **Supplementary Table 7.** The number of nodes for each L-Net skeleton generated from the  
 1144 ground truth and each segmentation method. Network names are organised based on number  
 1145 of recursive L-Net iterations and index, for example, 'LNet\_i4\_0' is the zeroth network of those  
 1146 with 4 iterations. Note, the number of known branching points is equal to number of iterations  
 1147 minus 3.

| <b>Name</b> | <b>Ground Truth</b> | <b>AT</b> | <b>AT+VF</b> | <b>RF</b> | <b>RF+VF</b> |
|-------------|---------------------|-----------|--------------|-----------|--------------|
| LNet_i4_0   | 4                   | 131       | 8            | 22        | 11           |
| LNet_i4_1   | 4                   | 107       | 4            | 25        | 47           |
| LNet_i4_2   | 4                   | 110       | 6            | 8         | 26           |
| LNet_i4_3   | 7                   | 155       | 39           | 204       | 445          |
| LNet_i4_4   | 4                   | 110       | 4            | 10        | 28           |
| LNet_i6_0   | 16                  | 175       | 20           | 61        | 111          |
| LNet_i6_1   | 18                  | 127       | 14           | 46        | 55           |
| LNet_i6_2   | 19                  | 172       | 30           | 76        | 172          |
| LNet_i6_3   | 16                  | 32        | 16           | 18        | 16           |
| LNet_i6_4   | 20                  | 141       | 20           | 49        | 39           |
| LNet_i8_0   | 62                  | 219       | 42           | 155       | 124          |
| LNet_i8_1   | 64                  | 144       | 24           | 89        | 65           |
| LNet_i8_2   | 68                  | 186       | 44           | 78        | 79           |
| LNet_i8_3   | 62                  | 241       | 40           | 90        | 85           |
| LNet_i8_4   | 62                  | 115       | 20           | 57        | 48           |
| LNet_i10_0  | 235                 | 144       | 60           | 142       | 122          |
| LNet_i10_1  | 232                 | 177       | 66           | 140       | 129          |
| LNet_i10_2  | 188                 | 162       | 52           | 124       | 100          |
| LNet_i10_3  | 171                 | 248       | 84           | 216       | 205          |
| LNet_i10_4  | 243                 | 152       | 90           | 178       | 164          |
| LNet_i12_0  | 615                 | 278       | 109          | 357       | 313          |
| LNet_i12_1  | 547                 | 314       | 121          | 323       | 323          |
| LNet_i12_2  | 593                 | 336       | 147          | 393       | 350          |

|            |      |     |     |     |     |
|------------|------|-----|-----|-----|-----|
| LNet_i12_3 | 765  | 233 | 102 | 264 | 268 |
| LNet_i12_4 | 601  | 206 | 104 | 309 | 286 |
| LNet_i14_0 | 2007 | 389 | 205 | 661 | 486 |
| LNet_i14_1 | 1801 | 501 | 292 | 696 | 648 |
| LNet_i14_2 | 1643 | 311 | 185 | 535 | 486 |
| LNet_i14_3 | 1332 | 476 | 205 | 535 | 499 |
| LNet_i14_4 | 1633 | 420 | 175 | 558 | 505 |

1148

1149

1150 **Supplementary Figures**

1151

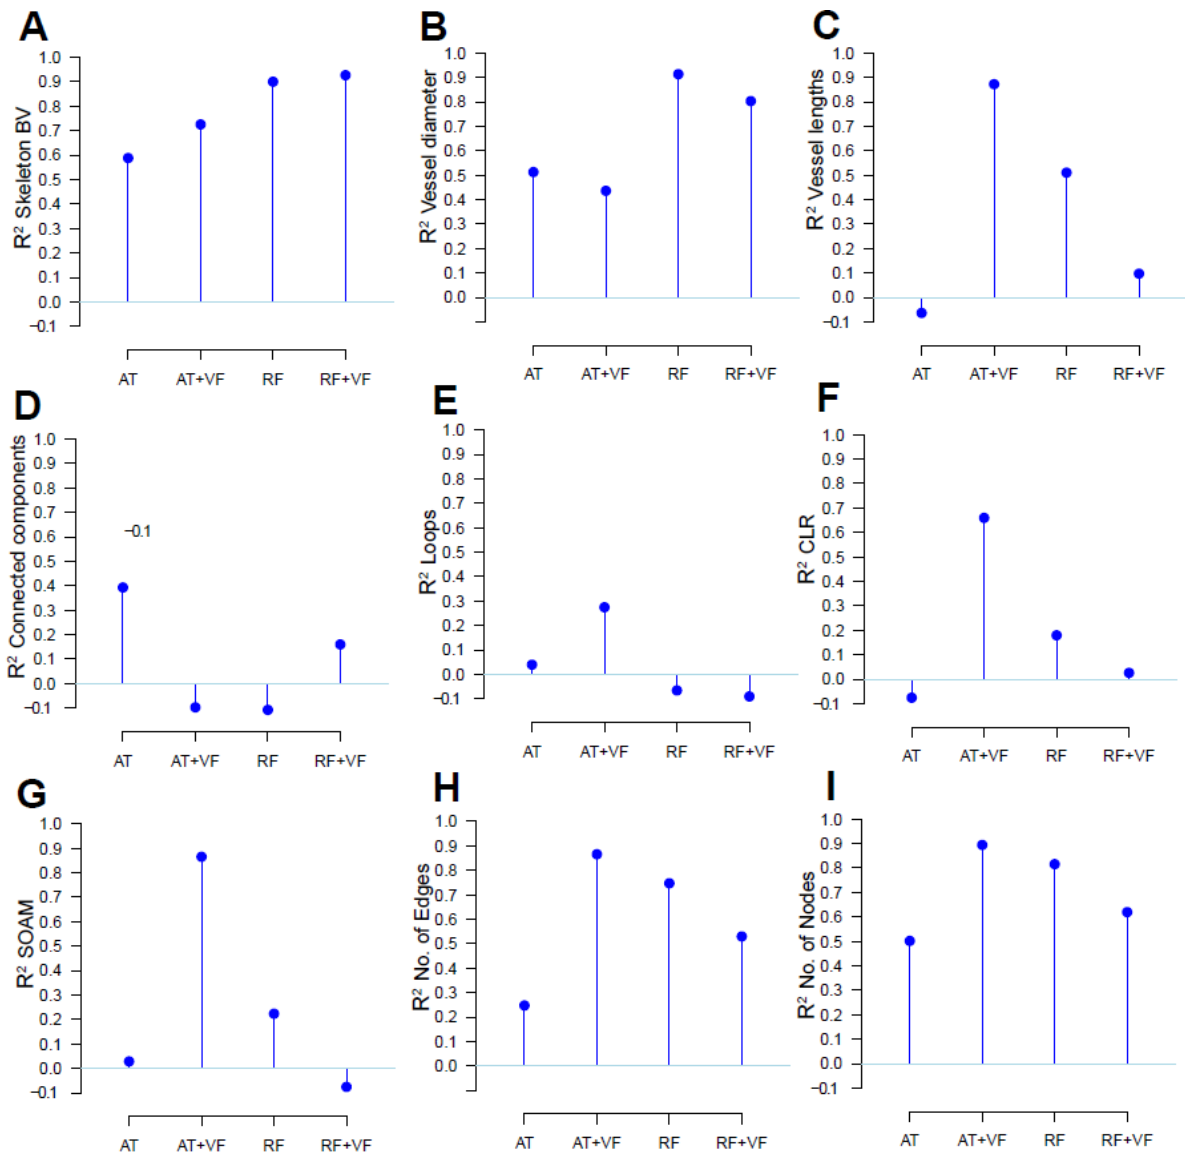

1152

1153 **Supplementary Figure 1. Random forest classifier segments PAI networks with high**  
1154 **accuracy while autothresholding with vesselness filtering preserves network structure.**

1155 Bar plot for  $R^2$  values calculated to compare the strength of relationship between the  
1156 segmented networks (AT, AT+VF, RF or RF+VF) and ground-truth L-nets for the following  
1157 metrics: (A) Normalised skeleton blood volume (BV), (B) Vessel diameters,  $\mu\text{m}$ , (C) Vessel  
1158 lengths,  $\mu\text{m}$ , (D) Connected components, (E) Loops, (F) chord-to-length ratio (CLR), (G) sum-  
1159 of-angle measure (SOAM), (H) Number of Edges and (I) Number of Nodes.

1160

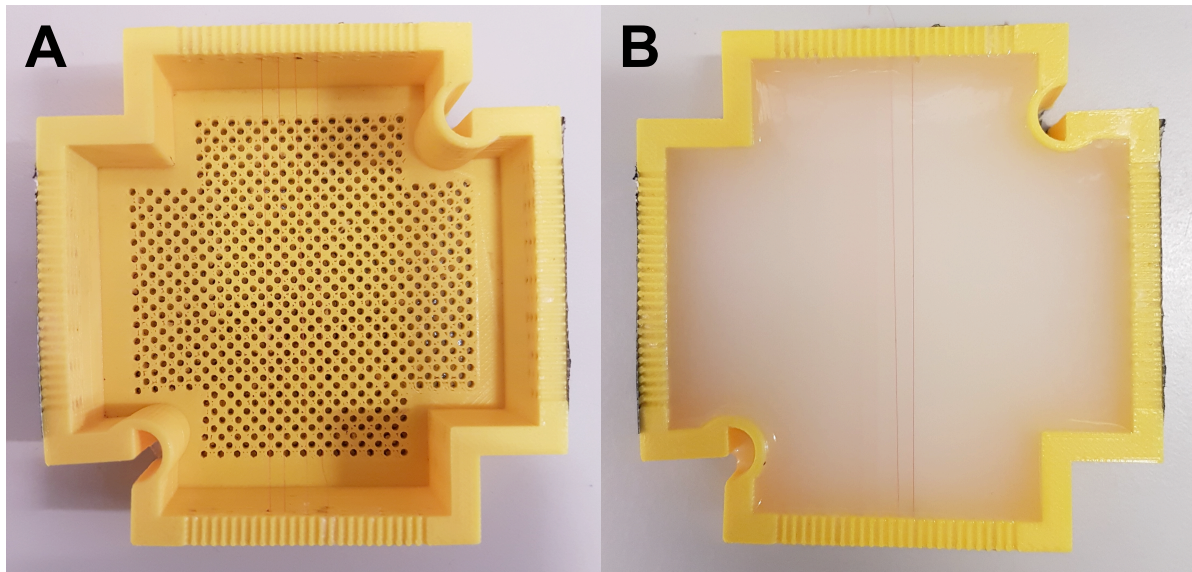

1161

1162 **Supplementary Figure 2. Photographs of the string phantom.** (A) 3D-printed mould (7.4 x  
1163 7.4 cm, wall thickness: 4 mm) with the embedded strings and (B) with the agar gel. The top  
1164 string was positioned at 0.5 mm from the agar surface, the middle one at 1 mm, and the bottom  
1165 one at 2 mm depth.

1166

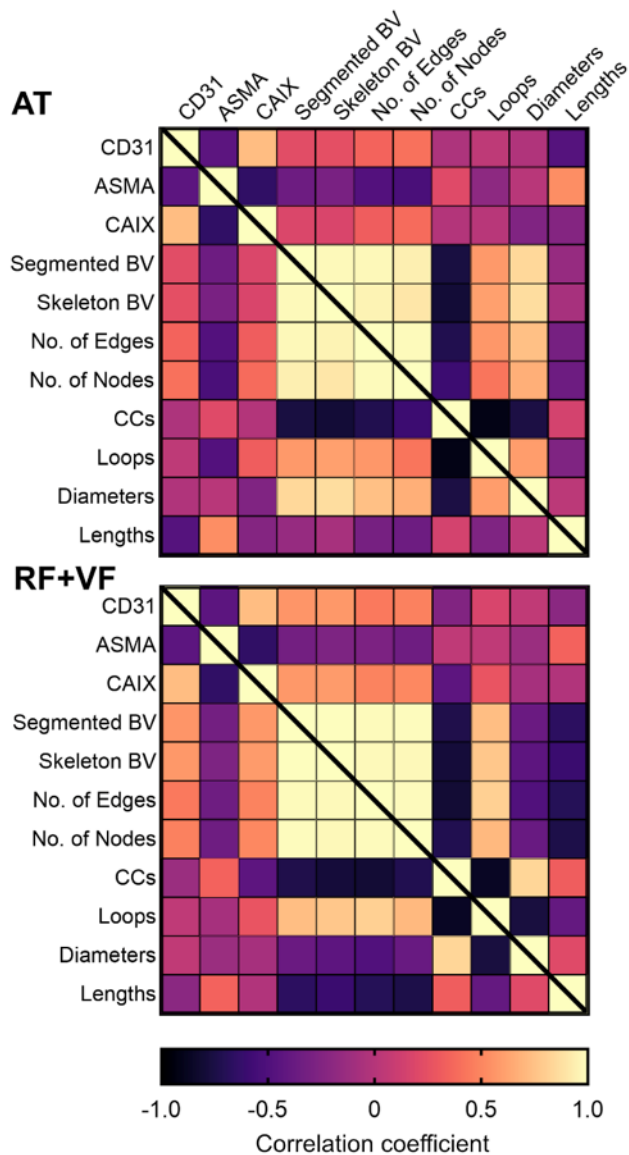

1167

1168 **Supplementary Figure 3. Correlation between blood volume and statistical and**

1169 **topological *in vivo* metrics with *ex vivo* IHC in AT and RF+VF segmented networks.**

1170 Matrix of correlation coefficients for AT (top) and RF+VF (bottom) segmented networks.

1171 Pearson or spearman coefficients are used as appropriate, depending on data distribution.

1172 Note that none of the coefficients are significant for AT networks ( $p > 0.05$ ). For RF+VF, CD31

1173 staining area and CAIX significantly correlated with segmented ( $p = 0.04$  and  $p = 0.03$

1174 respectively) and skeletonised blood volume ( $p = 0.03$  for both).

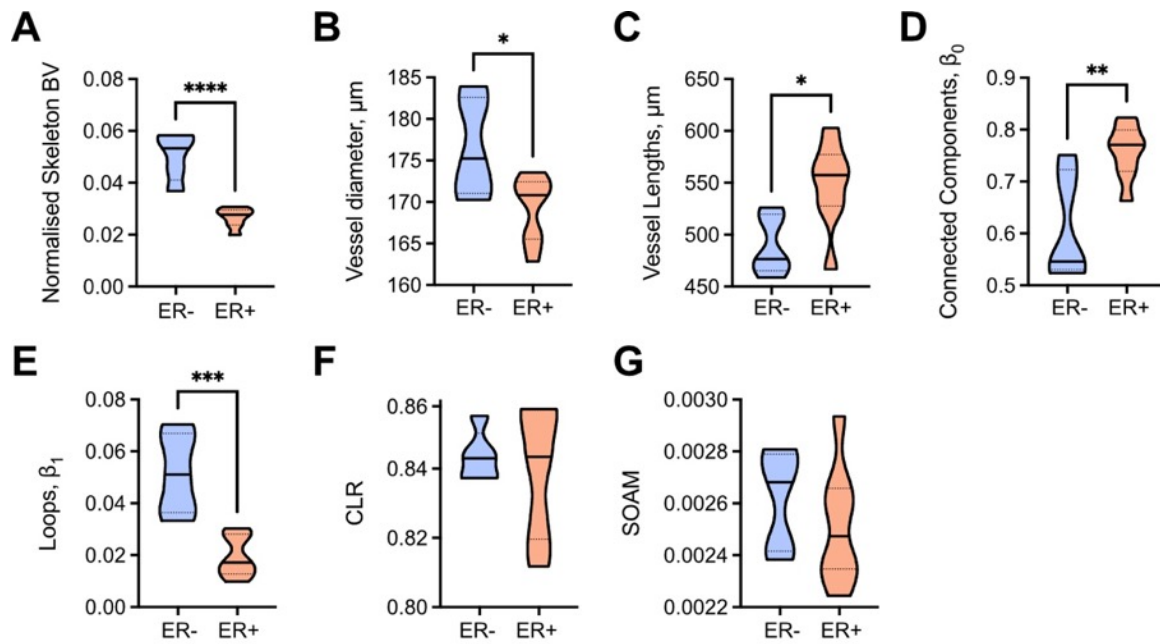

1175

1176 **Supplementary Figure 4. Statistical and topological analyses of AT+VF segmentation**

1177 **masks comparing ER- and ER+ tumours. (A-G) Abbreviations defined: blood volume (BV),**

1178 **chord-to-length ratio (CLR), sum-of-angle measure (SOAM). Data are represented by**

1179 **truncated violin plots with interquartile range (dotted black) and median (solid black).**

1180 **Comparisons between ER- and ER+ tumours made with unpaired t-test. \* =  $p < 0.05$ , \*\* =  $p < 0.01$ ,**

1181 **\*\*\* =  $p < 0.001$ , \*\*\*\* =  $p < 0.0001$ .**

1182

1183

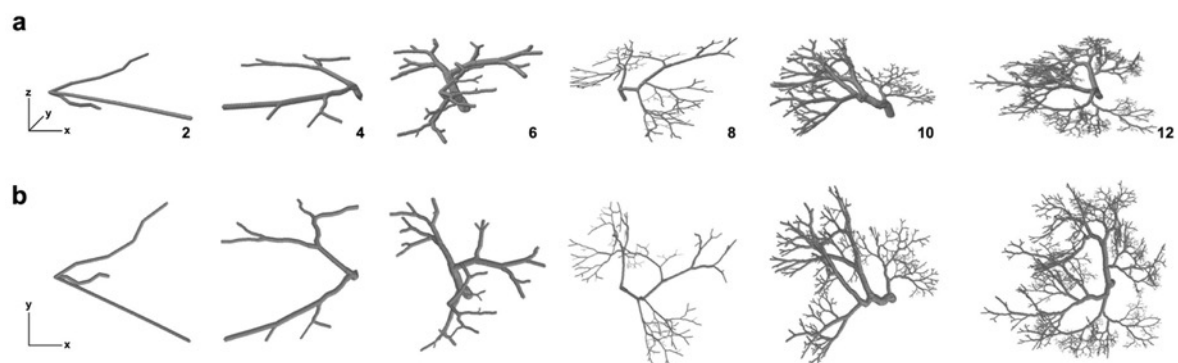

1184

1185 **Supplementary Figure 5. Generation of Lindenmayer System (L-System) vascular**  
1186 **networks.** (A) Segmented views of L-System vasculatures for an increasing number of  
1187 branching generations (left to right; number of generations indicated). (B) Projected view in  
1188 the (X,Y) plane of the architectures shown in (A).

1189

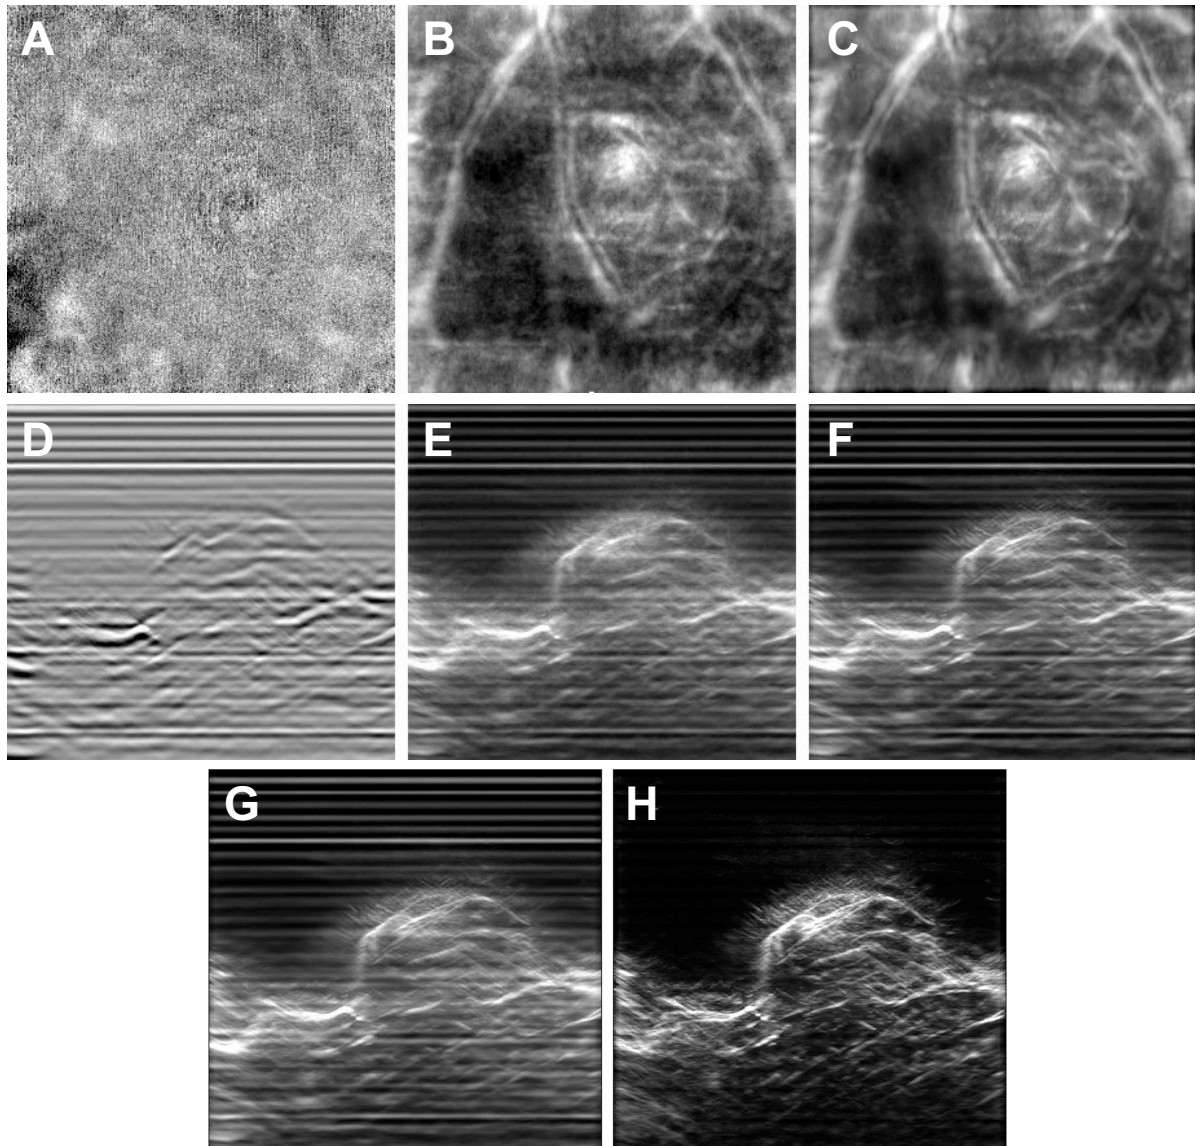

1190

1191 **Supplementary Figure 6. RSOM data pre-processing in MATLAB.** Mean Intensity  
1192 Projection 2D view of an example RSOM tumour dataset along Z axis (A-C) and Y axis (D-F)  
1193 axis. From left to right: raw data (A,D), high-pass filtered data (B,E), Wiener filtered data (C,F).  
1194 The images are processed sequentially through this pipeline, using high-pass filtering to  
1195 remove echo noises and low-pass adaptive Wiener filtering to further remove stochastic noise  
1196 in the datasets. (G) Image after MATLAB pre-processing. (H) Image after background  
1197 correction with rolling ball subtraction in Fiji. The periodical horizontal line artefacts are mostly  
1198 removed after background correction. All images are 6 x 6 mm.

1199



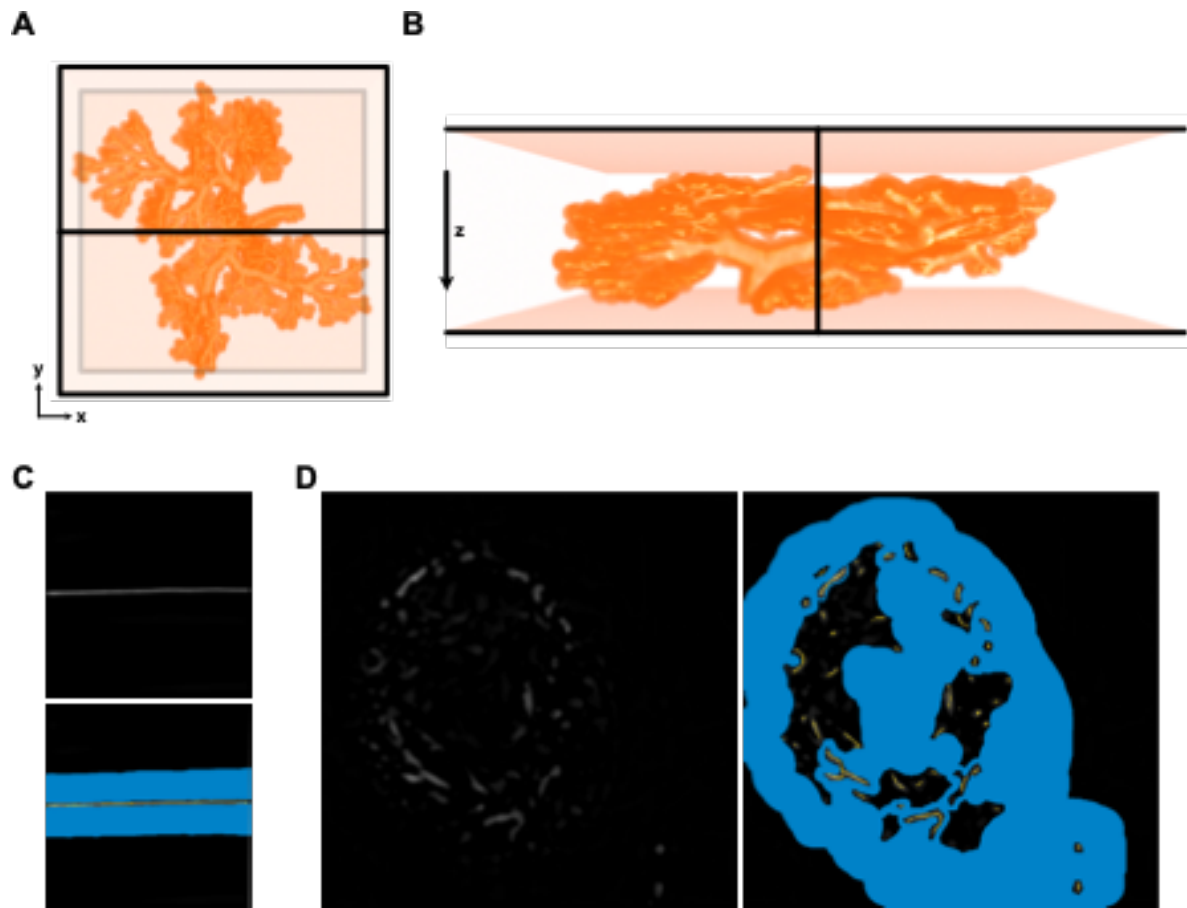

1200

1201 **Supplementary Figure 7. Labelling of photoacoustic data for random forest classifier**

1202 **training with ilastik.** (A,B) Labels for the full vascular architecture of a given L-net were used

1203 for training of ilastik. The region of the L-net within 10 voxels of the vessels was labelled as

1204 background (dark orange) in addition to a three voxel thick planes (shown in black). The first

1205 was located parallel to the z-axis, with the remaining two perpendicular at the top and bottom

1206 of the image volume. (C) Labelling of string volumes and (D) of PDX tumour vessels for ilastik

1207 training. For (C) and (D) background was labelled as blue and vessels labelled as yellow on

1208 2D slices throughout the 3D volume stack. All images are 6 x 6 mm.

1209

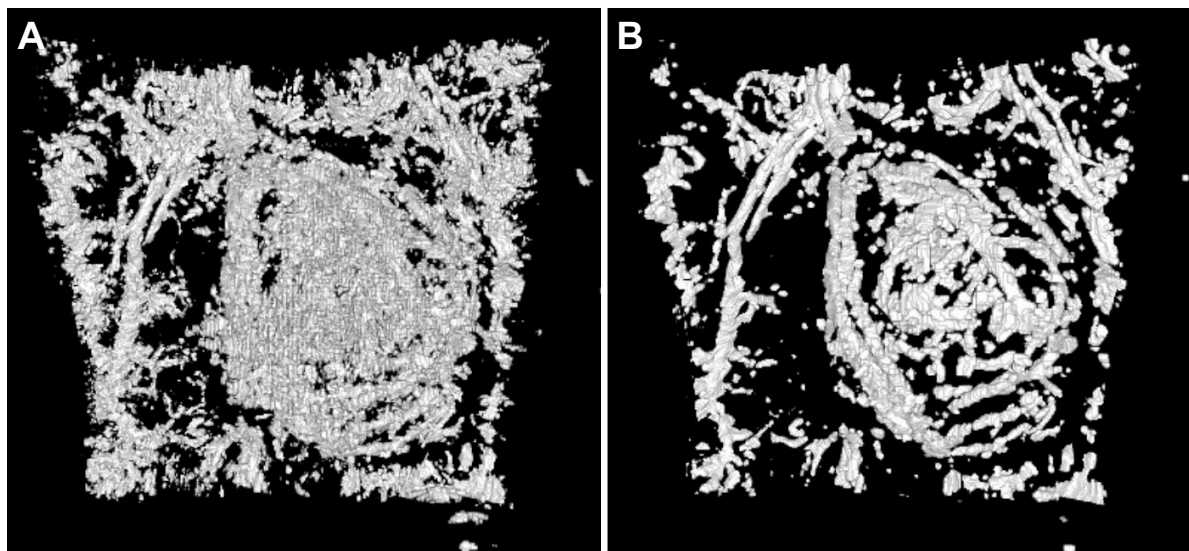

1210

1211 **Supplementary Figure 8. Median filtering of segmented RSOM images.** A 3D rendering  
1212 of the exemplar RSOM dataset (6 x 6 x 2.5 mm in X, Y and Z dimensions) used in  
1213 Supplementary Figure 6 is shown. (A) Autothresholded dataset. (B) Autothresholded dataset  
1214 after 3D Median filtering, to remove impulse noise.

1215

1216

1217

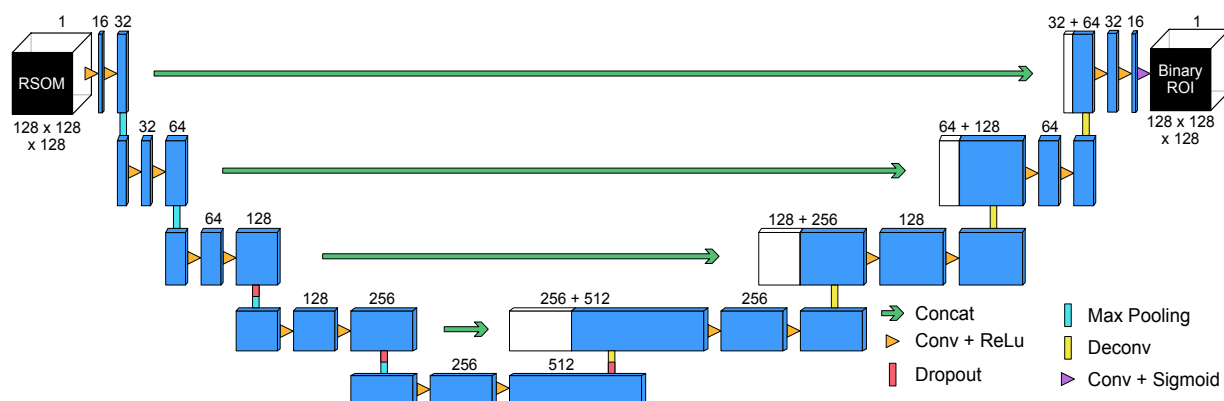

1219 **Supplementary Figure 9. 3D U-Net architecture.** The blue boxes indicate feature maps with

1220 the number of channels denoted above. The input and output image volumes consist of 128

1221 x 128 x 128 voxels. Concat = concatenation, Conv = convolution, ReLu = rectified linear unit,

1222 Deconv = deconvolution.

1223

1224

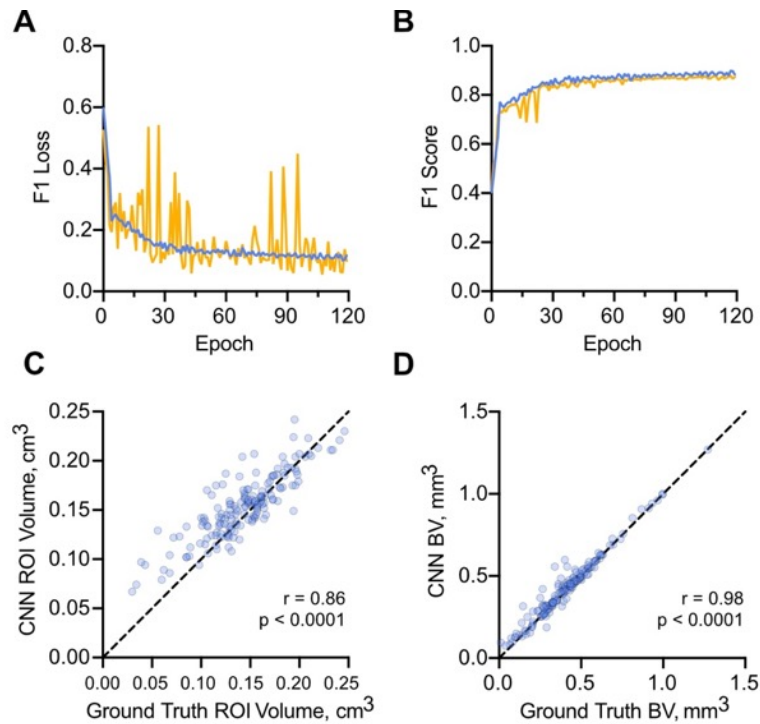

1225

1226 **Supplementary Figure 10. U-Net training metrics and predictions from the fully-trained**

1227 **architecture.** Training metrics: (A) F1 loss and (B) F1 score for the training (blue) and

1228 validation (orange) datasets. (C) Region-of-interest volumes calculated from the ground truth

1229 (GT) versus the U-Net mask. (D) Computed blood volumes using the ground truth and U-Net

1230 ROI estimations from (C). Note, the lines in (C) and (D) indicate a 1-to-1 relationship, and

1231 blood volumes in (B) were calculated using our auto-thresholding segmentation method.

1232
